# Supplementary material for: Sequential regulation of hemogenic fate and hematopoietic stem and progenitor cell formation from arterial endothelium by Ezh1/2
Source: PubMed Central journal article supplement — Stem Cell Reports. 2021 Jun 17;16(7):1718–34. doi: 10.1016/j.stemcr.2021.05.014 (PMC8282472; doi:10.1016/j.stemcr.2021.05.014), 2021-06-17
Supplement: mmc4.pdf [file mmc4.pdf]

## Sequential regulation of hemogenic fate and hematopoietic stem and progenitor cell formation from arterial endothelium by *Ezh1/2*

Rebecca A. Soto,<sup>1,2</sup> Mohamad Ali T. Najia,<sup>1,3,4</sup> Mariam Hachimi,<sup>1</sup> Jenna M. Frame,<sup>1</sup> Gabriel A. Yette,<sup>5</sup> Edroaldo Lummertz da Rocha,<sup>6</sup> Kryn Stankunas,<sup>5</sup> George Q. Daley,<sup>1,2</sup> and Trista E. North<sup>1,2,\*</sup>

<sup>1</sup>Stem Cell Program, Department of Hematology/Oncology, Boston Children's Hospital, Boston, MA 02115, USA

<sup>2</sup>Developmental and Regenerative Biology Program, Harvard Medical School, Boston, MA 02115, USA

<sup>3</sup>Division of Health Sciences & Technology, Massachusetts Institute of Technology, Cambridge, MA 02139, USA

<sup>4</sup>Broad Institute of MIT and Harvard, Cambridge, MA 02142, USA

<sup>5</sup>Institute of Molecular Biology, Department of Biology, University of Oregon, Eugene, OR 97403, USA

<sup>6</sup>Department of Microbiology, Immunology and Parasitology, Federal University of Santa Catarina, Florianópolis, Brazil

\*Correspondence: [trista.north@childrens.harvard.edu](mailto:trista.north@childrens.harvard.edu)

<https://doi.org/10.1016/j.stemcr.2021.05.014>

### SUMMARY

Across species, hematopoietic stem and progenitor cells (HSPCs) arise during embryogenesis from a specialized arterial population, termed hemogenic endothelium. Here, we describe a mechanistic role for the epigenetic regulator, Enhancer of zeste homolog-1 (*Ezh1*), in vertebrate HSPC production via regulation of hemogenic commitment. Loss of *ezh1* in zebrafish embryos favored acquisition of hemogenic (*gata2b*) and HSPC (*runx1*) fate at the expense of the arterial program (*ephrinb2a*, *dll4*). In contrast, *ezh1* overexpression blocked hematopoietic progression via maintenance of arterial gene expression. The related Polycomb group subunit, *Ezh2*, functioned in a non-redundant, sequential manner, whereby inhibition had no impact on arterial identity, but was capable of blocking *ezh1*-knockdown-associated HSPC expansion. Single-cell RNA sequencing across *ezh1* genotypes revealed a dropout of *ezh1*<sup>+/-</sup> cells among arterial endothelium associated with positive regulation of gene transcription. Exploitation of *Ezh1/2* modulation has potential functional relevance for improving *in vitro* HSPC differentiation from induced pluripotent stem cell sources.

### INTRODUCTION

The ability to derive patient-specific hematopoietic stem and progenitor cells (HSPCs) from mesodermal precursors capable of sustaining long-term self-renewal and multipotency has immense therapeutic potential. Despite continuing efforts to identify gene-regulatory networks that guide HSPC ontogeny *in vivo*, current *in vitro* differentiation protocols largely fail to efficiently produce long-lived multilineage progenitors from human pluripotent stem cell (PSC) sources (Slukvin and Uenishi, 2019), indicative of an incomplete understanding of the stage-specific regulators governing HSPC emergence and, in particular, the timing and targets of diverse gene regulation.

Many biological aspects of developmental hematopoiesis are highly conserved across vertebrate species, including successive waves of restricted progenitor production at discrete sites within the embryo (Rowe et al., 2016), followed by formation of multilineage HSPCs (Yzaguirre et al., 2017). HSPCs emerge in select arterial niches from a transient specialized subset of Runx1<sup>+</sup> endothelium, termed hemogenic endothelium (HE) (Kissa and Herbomel 2010; Slukvin and Uenishi, 2019). This fate transition occurs most notably within the ventral floor of the dorsal aorta (DA) via a remodeling process termed endothelial-to-hematopoietic transition (EHT), occurring between ~24 to 48 hours post fertilization (hpf) in the zebrafish embryo, and from around embryonic day 10.5 (E10.5) to

E12.5 in mice (Bertrand et al., 2010; Boisset et al., 2010; Kissa and Herbomel, 2010). Current *in vitro* and *in vivo* evidence indicates that activation of the arterial program permits subsequent acquisition of definitive HE properties (Bonkhofer et al., 2019; Slukvin and Uenishi, 2019). While many transcriptional regulators of embryonic hematopoiesis are known, the method by which a subset of arterial-fated endothelium is selected to acquire hemogenic capability and HSPC fate remains elusive.

Prior to HSPC emergence, immature endothelial cells undergo distinct transition steps allowing them to acquire arterial, venous, or lymphatic cell fate within the embryo (Dejana et al., 2017). Vascular endothelial growth factor (VEGF) and its cognate receptor VEGFR2 (Flk-1/Kdr) are critical regulators of developmental vasculogenesis (Dejana et al., 2017). Likewise, Hedgehog and Wnt/ $\beta$ -Catenin signaling pathways converge to control arterial-venous fate decisions, resulting in arterial-specific activation of Notch signaling via EphrinB2 and Dll4 (Butko et al., 2016). Suppression of artery formation by Notch inhibition in zebrafish embryos elicits ectopic expression of venous markers *flt4* and *rtk5*, demonstrating a role in repressing venous cell fate (Lawson et al., 2001). Notably, Notch signaling is also implicated in HE specification and subsequent HSPC emergence (Burns et al., 2005; Butko et al., 2016; Slukvin and Uenishi, 2019). In the zebrafish embryo, Notch ligands and receptors function sequentially during hematovascular development: *dll4* and *dlc* are important

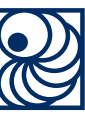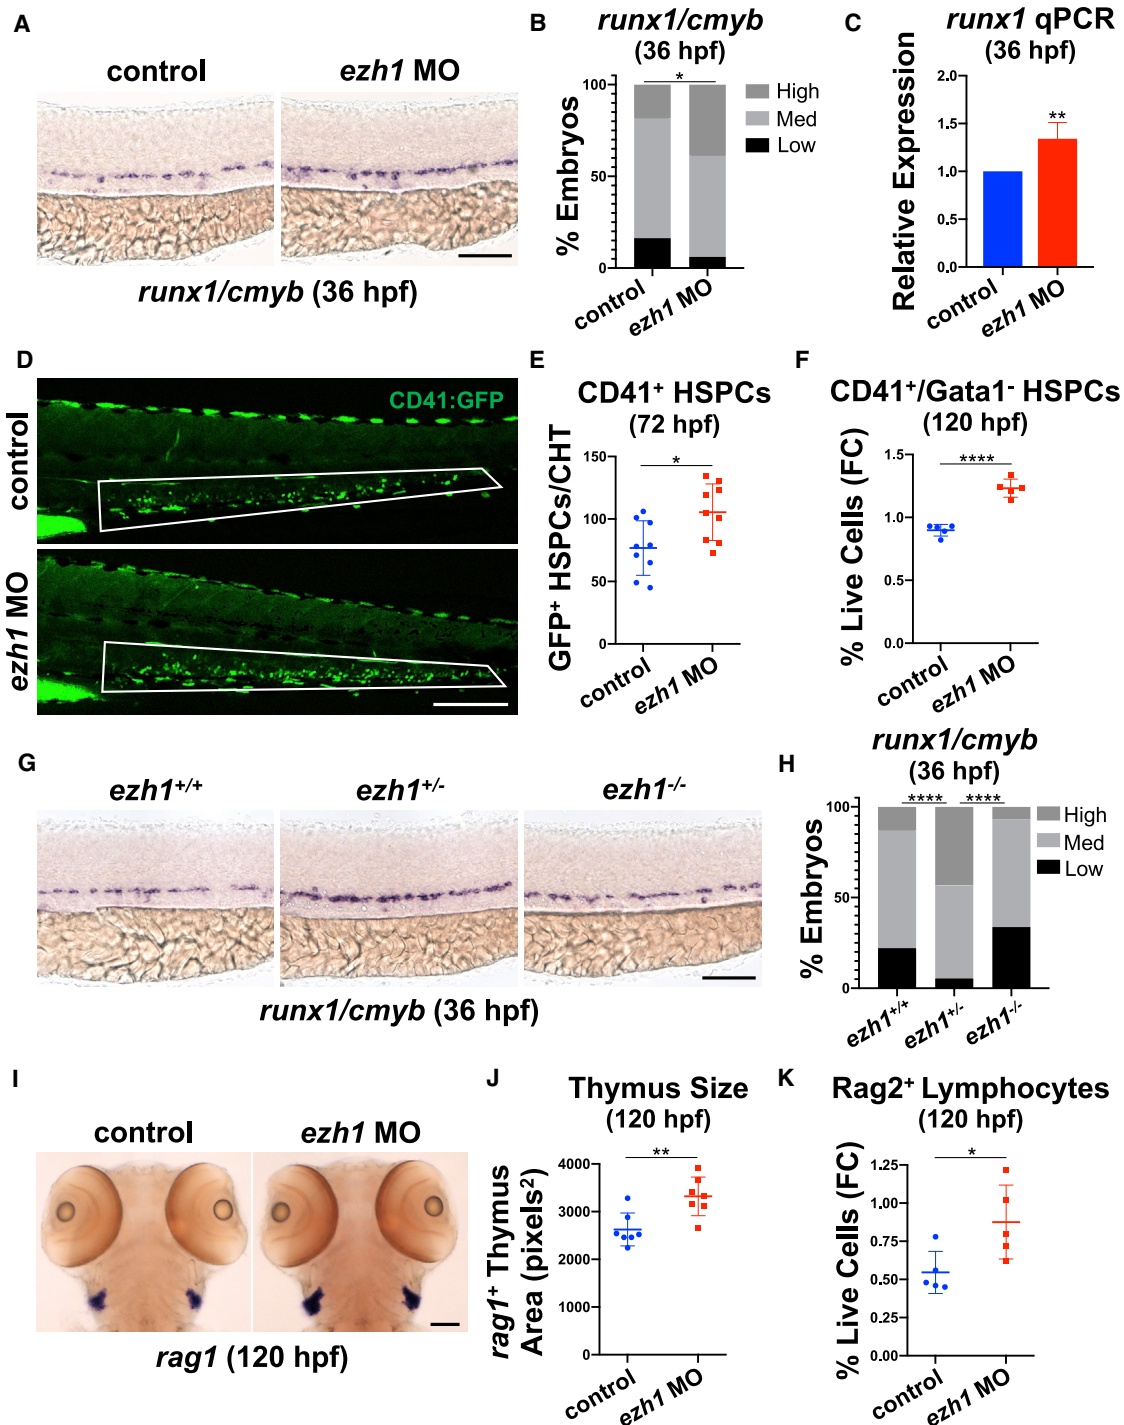

**Figure 1. *ezh1* loss increases the definitive hematopoietic program**

(A) WISH for *runx1/cmyb* in the DA of control and *ezh1* morphants at 36 hpf. Scale bar, 100  $\mu$ m.

(B) Qualitative phenotypic distribution plot of embryos in (A) ( $n \geq 49$  embryos/condition; \* $p < 0.05$ ).

(C) Whole-embryo *runx1* qPCR on control and *ezh1* morphants at 36 hpf relative to 18s ( $n \geq 25$  embryos/sample  $\times$  4 replicate clutches; two-tailed unpaired Student's t test, \*\* $p < 0.01$ . Mean  $\pm$  SEM).

(D) *In vivo* imaging of CD41:GFP+ cells in the CHT at 72 hpf in control and *ezh1* morphants. Scale bar, 200  $\mu$ m.

(E) Quantification of fluorescent images in (D) ( $n = 9$  embryos/condition; two-tailed unpaired Student's t test, \* $p < 0.05$ . Error bars indicate SD).

(legend continued on next page)

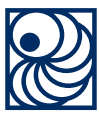

for arterial endothelium specification as early as the 5-somite stage (Lawson et al., 2001; Quillien et al., 2014), while *jag1a* is dispensable for artery formation but required for later HSPC production (Espín-Palazón et al., 2014; Monteiro et al., 2016). Critically, the regulatory mechanism influencing iterative uses of Notch activity to establish endothelial cell fate is undefined.

Genomic profiling of gene-regulatory networks that govern blood formation have revealed dynamic chromatin and transcriptional changes during HSPC specification and differentiation (Gao et al., 2020; Goode et al., 2016). It is increasingly appreciated that alterations in developmental differentiation can be attributed to epigenetic dynamics, facilitating the progressive silencing or activation of alternative lineages (Allis and Jenuwein, 2016). Classically, the histone methyltransferase subunits of Polycomb Repressive Complex 2 (PRC2), EZH1 and EZH2, repress gene transcription via trimethylation of lysine 27 on histone 3 (H3K27me3) (Margueron and Reinberg, 2011). Emerging evidence supports additional non-canonical function for PRC2-EZH1, including the ability to mediate gene activation (Chen et al., 2020; Mousavi et al., 2012; Xu et al., 2015). We previously demonstrated that knockdown of *EZH1* promoted emergence of HSPCs with multipotentiality, including lymphoid fate, from more lineage-restricted induced PSC (iPSC)-derived progenitors *in vitro* (Vo et al., 2018). However, the mechanism(s) by which Ezh1 regulates *de novo* HSPC production, including the cellular identity and/or signaling pathway alterations mediating this process, remains undetermined.

Here, as demonstrated by epistasis and overexpression studies, we elucidate the role of Ezh1-mediated maintenance of arterial fate in the DA of zebrafish embryos, whereby loss of *ezh1* allows transition to hemogenic fate and subsequent Ezh2-associated induction of HSPC formation. Mechanistically, differential expression of the arterial Notch ligand, *dll4*, was observed with *ezh1* loss compared with wild-type (WT) siblings, while the hematopoietic ligand and receptor pair, *jag1a* and *notch1a*, showed opposing regulation. Ultimately, our collective understanding of the complex gene-regulatory transitions required during vertebrate embryonic hematopoiesis *in vivo* may aid in the directed engineering of functional HSPCs from iPSC sources.

## RESULTS

### *ezh1* loss in zebrafish increases HSPC output and lymphoid potential *in vivo*

We previously observed increased engraftment of embryonic *Ezh1*<sup>+/-</sup> hematopoietic stem cells into adult mouse recipients (Vo et al., 2018); however, the mechanism by which Ezh1 mediated this effect was not identified. To determine whether *ezh1* elicited similar phenotypic effects *in vivo* using the zebrafish model, we employed functional knockdown techniques using an *ezh1* splice-blocking morpholino (*ezh1*-MO) (Huang et al., 2013) that promoted nonsense-mediated mRNA decay (Figure S1A). Whole-mount *in situ* hybridization (WISH) of *ezh1* morphants showed increased expression of the conserved HSPC markers *runx1* and *cmyb* in the DA at 36 hpf (Figures 1A and 1B); a significant increase in *runx1* expression was confirmed by qPCR (Figure 1C). Similar results were found using a lineage-specific *Tg(-6.Oitga2b:egfp)*<sup>la2</sup> reporter: fluorescence microscopy showed significantly more CD41<sup>+</sup> HSPCs in the caudal hematopoietic tissue (CHT) of *ezh1* morphants at 72 hpf (Figures 1D and 1E). This effect was sustained throughout development, as CD41<sup>+</sup>/Gata1<sup>-</sup> HSPCs were also significantly increased by fluorescence-activated cell sorting (FACS) at 120 hpf with *ezh1*-MO (Figure 1F). Intriguingly, *ezh1*<sup>+/-</sup> (Yette et al., 2021) catalytically dead mutant embryos phenocopied the morphant data, with increased *runx1* and *cmyb* expression, whereas *ezh1*<sup>-/-</sup> embryos displayed levels comparable with those of *ezh1*<sup>+/+</sup> embryos by WISH and qPCR (Figures 1G, 1H, and S1B), suggestive of a potential dosage or compensatory response, consistent with our prior observations (Vo et al., 2018).

As lymphoid potential was enhanced following *EZH1* knockdown *in vitro* (Vo et al., 2018), we evaluated the lymphoid compartment *in vivo*. WISH for lymphoid progenitors showed enhanced *rag1* expression with *ezh1*-MO (Figure 1I), which was reflected by increased total thymic area at 120 hpf (Figure 1J). FACS using the *Tg(rag2:gfp)* reporter line confirmed a significant increase in Rag2<sup>+</sup> lymphoid progenitors in *ezh1* morphants at 120 hpf (Figure 1K). Collectively, these data position zebrafish as an ideal system to study the mechanism of HSPC expansion following *ezh1* knockdown.

(F) Flow cytometry (FC) for CD41:GFP<sup>+</sup>/Gata1:dsRed<sup>-</sup> gated on percentage of live cells at 120 hpf in control and *ezh1* morphants (n = 5 embryos/sample × 5 biological replicates; two-tailed unpaired Student's t test, \*\*\*\*p < 0.0001. Error bars indicate SD).

(G) WISH for *runx1/cmyb* in *ezh1*<sup>+/+</sup>, *ezh1*<sup>+/-</sup>, *ezh1*<sup>-/-</sup> embryos at 36 hpf. Scale bar, 100 μm.

(H) Qualitative phenotypic distribution plot of embryos in (G) (n ≥ 74 embryos/genotype; \*\*\*\*p < 0.0001).

(I) WISH for *rag1* expression in the thymus of control and *ezh1* morphants at 120 hpf. Scale bar, 100 μm.

(J) Quantification of thymic area in (I) (n = 7 embryos/condition; two-tailed unpaired Student's t test, \*\*p < 0.01. Error bars indicate SD).

(K) Flow cytometry (FC) for Rag2:GFP<sup>+</sup> gated on percentage live cells at 120 hpf in control and *ezh1* morphants (n = 5 embryos/sample × 5 biological replicates; two-tailed unpaired Student's t test, \*p < 0.05. Error bars indicate SD).

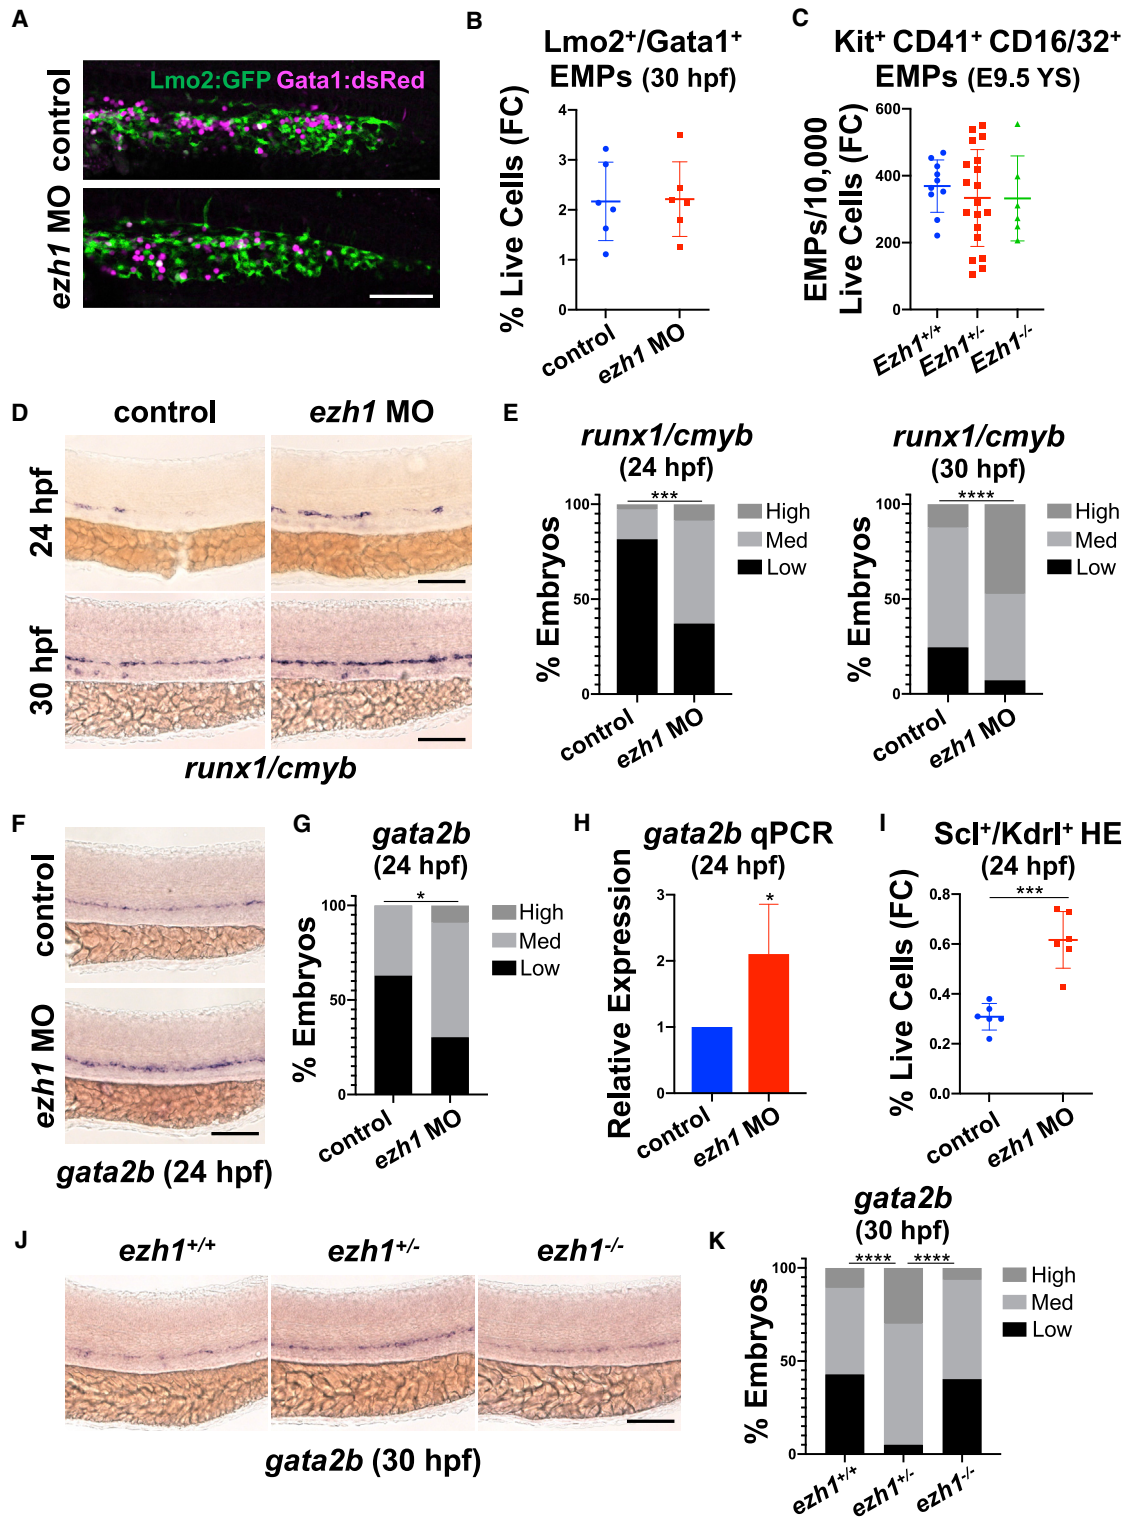

**Figure 2. *ezh1* knockdown promotes early commitment to HSPC fate and increased HE potential**

(A) Confocal imaging of Lmo2:GFP<sup>+</sup>/Gata1:dsRed<sup>+</sup> in the PBI at 30 hpf in control and *ezh1* morphants. Scale bar, 50  $\mu$ m.  
 (B) Flow cytometry (FC) for Lmo2:GFP<sup>+</sup>/Gata1:dsRed<sup>+</sup> gated on percentage of live cells at 30 hpf in control and *ezh1* morphants (n = 5 embryos/sample  $\times$  6 biological replicates; two-tailed unpaired Student's t test, not significant. Error bars indicate SD).

(legend continued on next page)



### ***ezh1* knockdown increases HSPCs via enhanced commitment to hemogenic fate**

Given the increase in HSPCs with *ezh1*-MO, we examined whether this effect occurred at the expense of earlier non-HSPC-derived blood cell lineages. By WISH and FACS, we found similar levels of primitive erythroid and myeloid cells in *ezh1* morphants compared with controls at 30 hpf (Figures S2A–S2C). Definitive hematopoiesis initiates with production of lineage-restricted erythromyeloid progenitors (EMPs) (Frame et al., 2013), which arise in the posterior blood island (PBI) of zebrafish as early as 24 hpf (Bertrand et al., 2007). By confocal imaging and FACS analysis with a *Tg(lmo2:EGFP); Tg(gata1a:dsRed)* reporter line, *Lmo2*<sup>+</sup> *Gata1*<sup>+</sup> EMPs (Bertrand et al., 2007) were enumerated in the PBI at 30 hpf, showing similar numbers and distribution in *ezh1* morphants and control siblings (Figures 2A and 2B). Likewise, FACS analysis of *Kit*<sup>+</sup>*CD41*<sup>+</sup>*CD16/32*<sup>+</sup> EMPs in the E9.5 murine yolk sac (McGrath et al., 2015) indicated that non-HSPC-derived fate-restricted progenitors appeared in equivalent numbers (Figure 2C). Together, these data suggest that *Ezh1* loss does not affect HSPC production at the expense of earlier waves of blood cell development.

We next determined whether the observed enhancement in HSPC numbers was indicative of alterations in commitment to HSPC fate. By WISH, we noted a greater fraction of *ezh1* morphants with high levels of *runx1* and *cmyb* as early as 24 hpf (Figures 2D and 2E). To determine whether loss of *ezh1* modulates HE specification, we assessed the conserved transcriptional regulator *Gata2* (Butko et al., 2015), which acts downstream of Notch signaling to promote HSPC formation via expression of *Runx1* (Gao et al., 2013; Nottingham et al., 2007; Robert-Moreno et al., 2005). In zebrafish, a partial genome duplication resulted in two *Gata2* paralogs (Butko et al., 2015): *Gata2a* was previously revealed to act as an upstream regulator of *gata2b* and *runx1* expression (Dobrzycki et al., 2020). By qPCR at 24 hpf, we saw a significant upregulation in *gata2a* expression with *ezh1*-MO (Figure S2D); likewise, expression of the HE-specific marker, *gata2b*, was also significantly increased by WISH and qPCR at

24 hpf (Figures 2F–2H). Enhanced HE specification with *ezh1*-MO was independently confirmed by FACS at 24 hpf in *Tg(-6tal1:egfp); Tg(kdrl:Has.HRAS-mCherry)*<sup>s916</sup> double-lineage reporter embryos (Carroll et al., 2014) (Figure 2I). A similar increase in *gata2b* expression was seen in *ezh1*<sup>+/-</sup> embryos, whereas *ezh1*<sup>-/-</sup> embryos had *gata2b* levels comparable with that of *ezh1*<sup>+/+</sup> siblings by WISH and qPCR (Figures 2J, 2K, and S2E). This effect on HE formation did not significantly influence proliferative expansion of *Kdrl*<sup>+</sup> cells in the DA, as there was no difference in 5-ethynyl-2'-deoxyuridine (EdU) incorporation between *ezh1* morphants and controls at 36 hpf (Figures S2F and S2G). Together, these data indicate that HSPC expansion occurs via enhanced HE specification following *ezh1* knockdown.

### **HE specification increases at the expense of arterial endothelial maintenance in *ezh1* morphants**

Studies of both mouse and zebrafish embryos indicate that HE is derived from arterial endothelium (AE) (Lizama et al., 2015; Bonkhofer et al., 2019). To explore whether *ezh1* loss affected the fate switch by which select AE acquires hemogenic competence, we further assessed vascular development. Gross vessel morphology appeared phenotypically normal between *ezh1* morphants and controls by WISH for *flk1* and confocal microscopy with the *Tg(kdrl:GFP)*<sup>la116</sup> reporter line at 24 hpf (Figures S3A–S3C). In contrast to the differential HE and HSPC phenotypes observed in haploinsufficient versus null embryos, there was a dramatic dose-dependent decrease in arterial *ephrinb2a* expression in *ezh1*<sup>+/-</sup> and *ezh1*<sup>-/-</sup> embryos by WISH and qPCR (Figures 3A, 3B, and S3D); this state could be rescued to WT levels in *ezh1*<sup>-/-</sup> embryos by overexpression of *dll4* mRNA (Figures S3E and S3F). By qPCR and WISH at 24 hpf, similar reductions were found for Notch-dependent arterial markers *ephrinb2a*, *dlc*, and *dll4* (Figures 3C–3E) and Notch-independent *tbx20* (Lawson et al., 2001) in *ezh1* morphants (Figure 3C). To determine whether reduced arterial expression resulted in a shift toward venous differentiation, as previously observed for loss of Notch signaling (Lawson et al., 2001;

(C) Flow cytometry (FC) for *Kit*<sup>+</sup>*CD41*<sup>+</sup>*CD16/32*<sup>+</sup> gated on 10,000 live cells derived from E9.5 yolk sacs (YS) from *Ezh1*<sup>+/+</sup>, *Ezh1*<sup>+/-</sup>, *Ezh1*<sup>-/-</sup> mouse embryos (n ≥ 6 yolk sacs/genotype; one-way ANOVA, not significant. Error bars indicate SD).

(D) WISH for *runx1/cmyb* at 24 and 30 hpf in control and *ezh1* morphants. Scale bar, 100 μm.

(E) Qualitative phenotypic distribution plot of embryos in (D) (n ≥ 60 embryos/condition; \*\*\*p < 0.001, \*\*\*\*p < 0.0001).

(F) WISH for *gata2b* at 24 hpf in control and *ezh1* morphants. Scale bar, 100 μm.

(G) Qualitative phenotypic distribution plot of embryos in (F) (n = 35 control, 33 *ezh1* morphants; \*p < 0.05).

(H) Whole-embryo *gata2b* qPCR on control and *ezh1* morphants at 24 hpf relative to 18s (n ≥ 25 embryos/sample × 4 replicate clutches; two-tailed unpaired Student's t test, \*p < 0.05. Mean ± SEM).

(I) Flow cytometry (FC) on *Scl:GFP*<sup>+</sup>/*Kdrl:mCherry*<sup>+</sup> gated on percentage of live cells at 24 hpf in control and *ezh1* morphants (n = 5 embryos/sample × 6 biological replicates; two-tailed unpaired Student's t test, \*\*\*p < 0.001. Error bars indicate SD).

(J) WISH for *gata2b* in *ezh1*<sup>+/+</sup>, *ezh1*<sup>+/-</sup>, *ezh1*<sup>-/-</sup> embryos at 30 hpf. Scale bar, 100 μm.

(K) Qualitative phenotypic distribution plot of embryos in (J) (n ≥ 40 embryos/genotype; \*\*\*\*p < 0.0001).

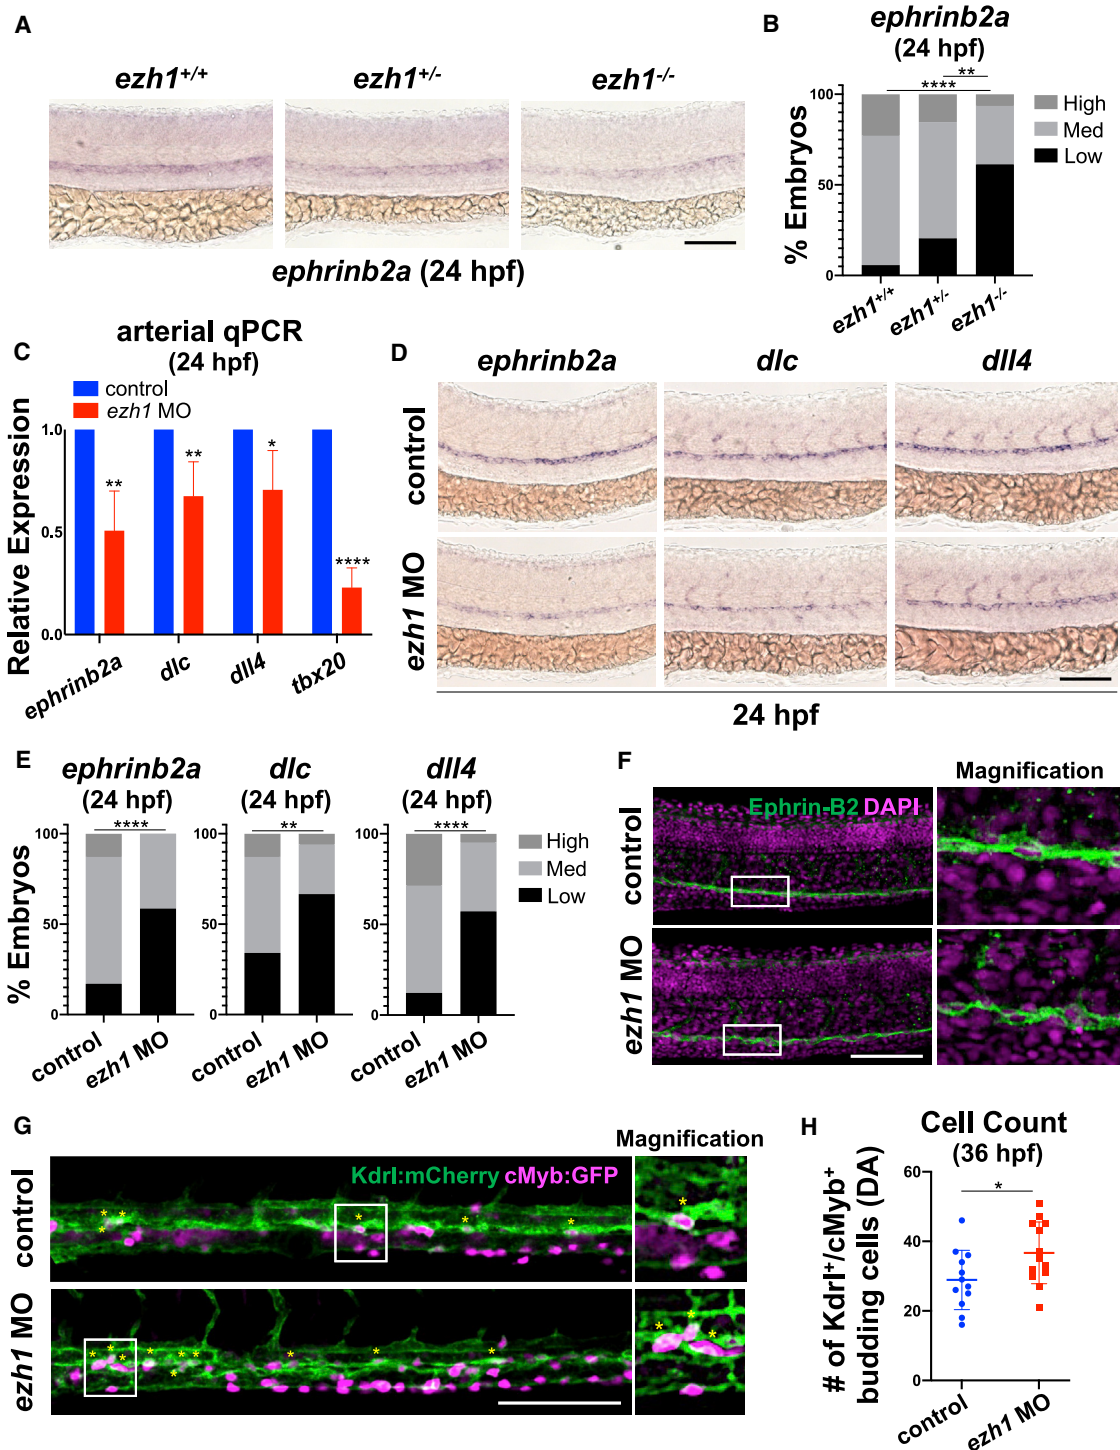

**Figure 3. Hemogenic endothelial specification is increased at the expense of arterial endothelial maintenance following *ezh1* loss**

(A) WISH for *ephrinb2a* in *ezh1*<sup>+/+</sup>, *ezh1*<sup>+/-</sup>, *ezh1*<sup>-/-</sup> embryos at 24 hpf. Scale bar, 100  $\mu$ m.

(B) Qualitative phenotypic distribution plot of embryos in (A) ( $n \geq 31$  embryos/genotype; \*\* $p < 0.01$ , \*\*\*\* $p < 0.0001$ ).

(C) Whole-embryo *ephrinb2a*, *dlc*, *dll4*, and *tbx20* qPCR on control and *ezh1* morphants at 24 hpf relative to 18s ( $n \geq 25$  embryos/sample  $\times$  4 replicate clutches; two-tailed unpaired Student's t test, \*\* $p < 0.01$ , \* $p < 0.05$ , \*\*\*\* $p < 0.0001$ . Mean  $\pm$  SEM).

(D) WISH for arterial markers *ephrinb2a*, *dlc*, and *dll4* in control and *ezh1* morphants at 24 hpf. Scale bar, 100  $\mu$ m.

(legend continued on next page)



Carroll et al., 2014), we assessed *flt4* expression by WISH and found it to be unaffected in *ezh1* morphants or mutants at 24 hpf (Figures S3G–S3I). Significantly, no impact on *ephrinb2a* expression was seen at 18 hpf (Figures S3J–S3L), suggesting that Ezh1 influences maintenance, not initiation, of AE fate. Confocal microscopy with an Ephrin-B2 antibody revealed disrupted endothelial patterning in *ezh1* morphants at 24 hpf (Figure 3F), with more Ephrin-B2<sup>neg</sup> cells along the aortic floor exhibiting a rounded morphology than controls. Analysis of *Tg(kdrl:Has.HRAS-mCherry)<sup>s916</sup>;Tg(cmyb:EGFP)<sup>zfl169</sup>* *ezh1* morphants confirmed that these “budding” cells corresponded to increased numbers of double-positive HSPCs at 36 hpf (Figures 3G and 3H). These studies indicate that *ezh1* loss is correlated with altered developmental fate of the DA endothelium, including increased EHT.

### Ezh2 inhibition blocks *ezh1*-knockdown-mediated HSPC expansion

PRC2-associated histone methyltransferases EZH1 and EZH2 often exhibit differential cellular localization (Margueron et al., 2008), influencing their regulatory action. Consistent with prior reports (Völkel et al., 2019), we observed global non-specific *ezh1* expression at 24 hpf by WISH compared with the sense control (Figure S4A). As *ezh1* modulation affects hematovascular fate, we next profiled defined endothelial fractions for *ezh1* and *ezh2* expression by qPCR following FACS isolation. Using *Tg(kdrl:GFP)<sup>la116</sup>*, *Tg(-0.8flt1:tdTomato)*, *TgBAC(gata2b:KalTA4)<sup>sd32</sup>*, *Tg(UAS:lifect-GFP)<sup>mu271</sup>*, and *Tg(cmyb:EGFP)<sup>zfl169</sup>* reporter lines, we segregated bulk Flk1<sup>-</sup>/Flt1<sup>-</sup> non-endothelial cells (NECs), Flk1<sup>+</sup>/Flt1<sup>-</sup> non-arterial endothelial cells (NAECs), Flk1<sup>+</sup>/Flt1<sup>+</sup> AE (Figure S4B), Gata2b<sup>+</sup> HE, and Flk1<sup>+</sup>/cMyb<sup>+</sup> HSPCs. While qPCR for *ezh1* showed ubiquitous, albeit low, expression across all fractions, *ezh2* was more dynamic, with notably lower expression in AECs compared with NECs or HSPCs (Figure 4A).

Interestingly, with *ezh1*-MO, we observed upregulation of *ezh2* expression during the window of HSPC emergence by qPCR (Figure 4B). As complete loss of Ezh2 function is lethal (Dupret et al., 2017; O’Carroll et al., 2001; San et al., 2016; San et al., 2018), to investigate a role for Ezh2 in Ezh1-mediated regulation of HSPC production we used pharmacological inhibition of Ezh2 by exposure to GSK126 (Dupret et al., 2017). In contrast to *ezh1* loss, GSK126-treated embryos showed a significant decrease in CD41<sup>+</sup> HSPCs (Figures 4C and 4D). Furthermore, epistasis

analyses showed that Ezh2 inhibition blocked the positive effect of *ezh1*-MO on HSPC production, resulting in fewer CD41<sup>+</sup> cells at 72 hpf (Figures 4C and 4D). A similar reduction was seen in GSK126-treated embryos for *runx1* and *cmyb* expression by WISH and *runx1* expression by qPCR, with or without *ezh1* loss (Figures S4C–S4E). In contrast, *ezh2* mRNA overexpression increased HSPC marker expression by WISH and qPCR (Figures S4F–S4H). These findings indicate that increased HSPC number in the setting of *ezh1* loss requires Ezh2 function.

Despite potent effects on HSPC formation seen with Ezh2 modulation, embryos treated with GSK126 from 12 to 24 hpf did not exhibit a reduction in expression of *ephrinb2a*, *dll4*, *dlc*, and *tbx20* by qPCR (Figure 4E); likewise, expression of arterial markers was unaltered by *ezh2* mRNA overexpression (Figure 4F). In addition to proper arterial identity, GSK126-treated embryos had normal venous *flt4* expression by WISH (Figures S4I and S4J). Furthermore, *gata2b* HE specification was unperturbed by Ezh2 inhibition by WISH and qPCR (Figures 4G–4I). Collectively, these data indicate that Ezh1 and Ezh2 play sequential, non-redundant regulatory roles in HSPC generation from endothelial precursors in the embryonic DA.

### scRNA-seq analysis of *ezh1* loss-of-function embryos confirms altered arterial fate

To identify molecular changes in the endothelium reflecting PRC2-regulated hematovascular commitment, we performed single-cell RNA sequencing (scRNA-seq) of sorted GFP<sup>+</sup> cells from stage-matched *ezh1<sup>+/+</sup>;Tg(kdrl:EGFP)<sup>s843</sup>*, *ezh1<sup>+/-</sup>;Tg(kdrl:EGFP)<sup>s843</sup>*, and *ezh1<sup>-/-</sup>;Tg(kdrl:EGFP)<sup>s843</sup>* embryos at 30 hpf. Using the 10X Genomics Chromium platform, we obtained transcriptomes of 4,033, 3,850, and 2,970 cells from *ezh1<sup>+/+</sup>*, *ezh1<sup>+/-</sup>*, and *ezh1<sup>-/-</sup>* embryos, respectively. Graph-based clustering on all cells resulted in 18 distinct clusters (Figure 5A), which were annotated for cell type based on differentially expressed marker genes (Tables S1 and S2; Figure S5A): Erythroid 1-5 (cluster 0, 1, 5, 6, 13); Epithelium 1-3 (cluster 3, 16, 17); Nervous System 1-4 (cluster 4, 9, 10, 11); Macrophage (cluster 8); Neutrophil 1-2 (cluster 7, 14); Endothelium 1-2 (cluster 2, 12); and Cardiovascular (cluster 15). A subset of clusters was identified that prominently expressed *GFP*, concordant with high *kdrl* expression (Figure 5B). Furthermore, within the GFP<sup>hi</sup> fraction, two clusters displayed *cdh5*, *lmo2*, *etv2*, and *fli1b* expression (Figure S5B), and were classified as endothelial cells.

(E) Qualitative phenotypic distribution plot of embryos in (D) ( $n \geq 42$  embryos/condition; \*\* $p < 0.01$ , \*\*\*\* $p < 0.0001$ ).

(F) Confocal imaging of the DA from 24 hpf control and *ezh1* morphant embryos. DAPI<sup>+</sup> nuclei shown in magenta, Ephrin-B2<sup>+</sup> cells shown in green. Scale bar, 100  $\mu\text{m}$ .

(G) Confocal imaging of *Kdrl:mCherry<sup>+</sup>/cMyb:GFP<sup>+</sup>* budding HSPC cells in control and *ezh1* morphants at 36 hpf in the DA. Scale bar, 100  $\mu\text{m}$ .

(H) Quantification of confocal images in (G) ( $n = 12$  control, 13 *ezh1* morphants; two-tailed unpaired Student’s  $t$  test, \* $p < 0.05$ . Error bars indicate SD).

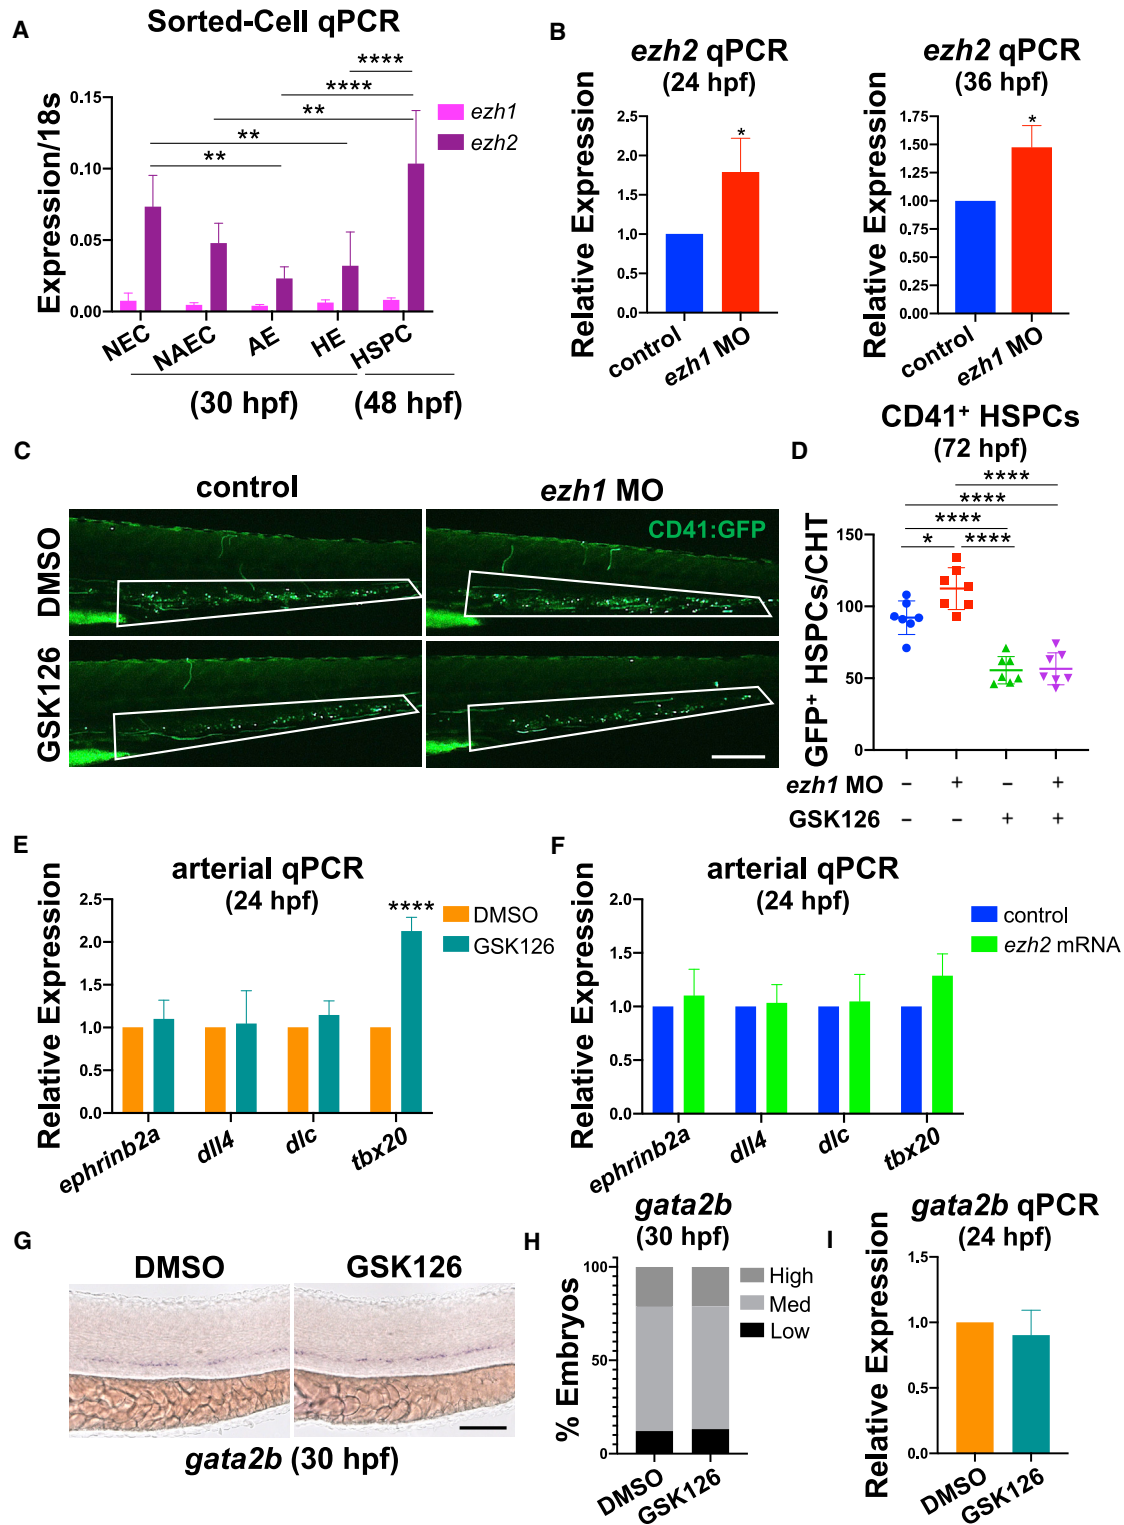

**Figure 4. Ezh2 function is required downstream for *ezh1*-knockdown-mediated HSPC expansion**

(A) Sorted cell qPCR at 30 and 48 hpf for *ezh1* and *ezh2* expression on bulk Flk1<sup>-</sup>/Flt1<sup>-</sup> non-endothelial cells (NEC), Flk1<sup>+</sup>/Flt1<sup>-</sup> non-arterial endothelial cells (NAEC), Flk1<sup>+</sup>/Flt1<sup>+</sup> arterial endothelium (AE), Gata2b<sup>+</sup> hemogenic endothelial cells (HE), and Flk1<sup>+</sup>/cMyb<sup>+</sup>

(legend continued on next page)





We further interrogated the two endothelial cell (EC1 and EC2) clusters across genotypes, and observed a reduced proportion of *ezh1*<sup>+/-</sup> cells in EC2 compared with *ezh1*<sup>+/+</sup> cells (Figure 5C); this effect was observed across several independent single-cell libraries of *ezh1*<sup>+/-</sup> cells, reflective of biological differences and not technical dropout of single cells (Figure S5C). We next performed differential gene expression analysis to identify transcriptional differences between EC1 and EC2. EC2 was enriched in various Hox genes known to affect hematopoiesis (Alharbi et al., 2013)—*hoxa9a*, *hoxa9b*, *hoxb7a*, *hoxb9a*, and *hoxd9a*—as well as Notch arterial associated genes *hey1*, *hey2*, and *dll4* (Figure 5D). Positively enriched genes within EC2 compared with EC1 were utilized in gene ontology (GO) enrichment analysis using GOrilla (Eden et al., 2009) (Figure 5E). Interestingly, enriched Hox genes were associated with the biological function “DNA-binding transcription factor activity, RNA polymerase II specific” (Figure 5E). Therefore, we next examined which biological processes are affected following *ezh1* loss, whereby GO analysis revealed that *ezh1*<sup>+/-</sup> endothelial cells downregulate genes related to RNA maturation processes such as *sf3a2*, *srsf9*, *srsf2a*, and *ybx1* (Figure 5F). Prior reports describe a distinct PRC2 complex composed of SUZ12 and EZH1 that promotes gene transcription through RNA polymerase II elongation, in particular via activation of *DLL4* expression in cultured endothelial cells (Chen et al., 2020; Mousavi et al., 2012; Xu et al., 2015), together supportive of a potential regulatory impact on arterial versus hemogenic fate.

Select cells within EC1 and EC2 significantly expressed markers associated with arterial identity including *efnb2a*, *dll4*, and *flt1* (Figure S5D). This observation prompted re-clustering of the EC populations, identifying eight distinct subclusters, including two representing AE (AE1 and AE2) (Figure 5G) based on marker gene enrichment (Figure 5H). Significantly, we observed a reduced proportion of *ezh1*<sup>+/-</sup> cells in AE1 compared with *ezh1*<sup>+/+</sup> cells (Figures 5I and

S5E), consistent with our heterozygote and morphant arterial phenotype. Importantly, loss of *ezh1*<sup>+/-</sup> cells in AE1 correlated with decreased expression of arterial markers *efnb2a* and *dll4* (Figure 5J), reflective of a failure to maintain arterial identity and potential transition to HE fate in heterozygotes. To evaluate whether a similar transition may be relevant to our prior *in vitro* observations, we performed gene set enrichment analysis (GSEA) on our RNA-seq dataset collected from day-28 CD34<sup>+</sup>CD38<sup>-</sup> 5F control versus *EZH1*-knockdown HSPCs (Vo et al., 2018). This analysis showed enrichment in signaling pathways needed to establish AE and HSPC emergence *in vivo* (Figures 5K and S5F), suggesting that in defined endothelial subpopulations during hemogenic commitment *Ezh1* acts as an arterial transcriptional activator.

### Ezh1 blocks hematopoietic fate via pro-arterial regulation

Dynamic chromatin modifications and associated transcriptional changes are necessary during development to achieve lineage specificity via activation or repression of gene expression. To determine whether progression of HSPC formation from AE is regulated by *Ezh1* function, we overexpressed zebrafish *ezh1* by mRNA injection, which negatively affected *runx1* and *cmyb* WISH at 36 hpf (Figures 6A and 6B). *ezh1*-OE also significantly reduced CD41<sup>+</sup>/Gata1<sup>-</sup> HSPCs (Figure 6C) and Rag2<sup>+</sup> lymphoid progenitors (Figure 6D) at 120 hpf by FACS, indicating that *Ezh1* normally acts to restrict progression to the hematopoietic program.

Given that loss of *ezh1* alters arterial and HSPC balance in the DA, we hypothesized that modulations in Notch signaling could be a relevant mechanism. Abrogation of Notch activity by exposure (12–36 hpf) to the  $\gamma$ -secretase inhibitor *N*-[*N*-(3,5-difluorophenacetyl)-L-alanyl]-*S*-phenylglycine *t*-butyl ester (DAPT) (Geling et al., 2002) abolished *ezh1*-MO-associated HSPC expansion by WISH

hematopoietic stem and progenitor cells (HSPC). Reference gene: 18s (n ≥ 20 embryos/sample × ≥ 3 replicate clutches; two-way ANOVA, \*\*p < 0.01, \*\*\*\*p < 0.0001. Mean ± SEM).

(B) Whole-embryo *ezh2* qPCR on control and *ezh1* morphants at 24 and 36 hpf relative to 18s (n ≥ 25 embryos/sample × 3 replicate clutches; two-tailed unpaired Student's t test, \*p < 0.05. Mean ± SEM).

(C) *In vivo* imaging of CD41:GFP<sup>+</sup> cells in the CHT in control and *ezh1* morphants ± dimethyl sulfoxide (DMSO)/1 μM GSK126 treatment from 12 to 72 hpf. Scale bar, 200 μm.

(D) Quantification of fluorescent images in (C) (n = 7 embryos/condition; one-way ANOVA, \*p < 0.05, \*\*\*\*p < 0.0001. Error bars indicate SD).

(E) Whole-embryo *ephrinb2a*, *dll4*, *dlc*, and *tbx20* qPCR on DMSO and 1 μM GSK126-treated embryos from 12 to 24 hpf relative to 18s (n ≥ 25 embryos/sample × ≥ 3 replicate clutches; two-tailed unpaired Student's t test, \*\*\*\*p < 0.0001. Mean ± SEM).

(F) Whole-embryo *ephrinb2a*, *dll4*, *dlc*, and *tbx20* qPCR on control and *ezh2* mRNA-injected embryos at 24 hpf relative to 18s (n ≥ 25 embryos/sample × 3 replicate clutches; two-tailed unpaired Student's t test, not significant. Mean ± SEM).

(G) WISH for *gata2b* on DMSO and 1 μM GSK126-treated embryos from 12 to 30 hpf. Scale bar, 100 μm.

(H) Qualitative phenotypic distribution plot of embryos in (G) (n = 33 DMSO, 38 GSK126-treated embryos).

(I) Whole-embryo *gata2b* qPCR on DMSO and 1 μM GSK126-treated embryos from 12 to 24 hpf relative to 18s (n ≥ 25 embryos/sample × 4 replicate clutches; two-tailed unpaired Student's t test, not significant. Mean ± SEM).

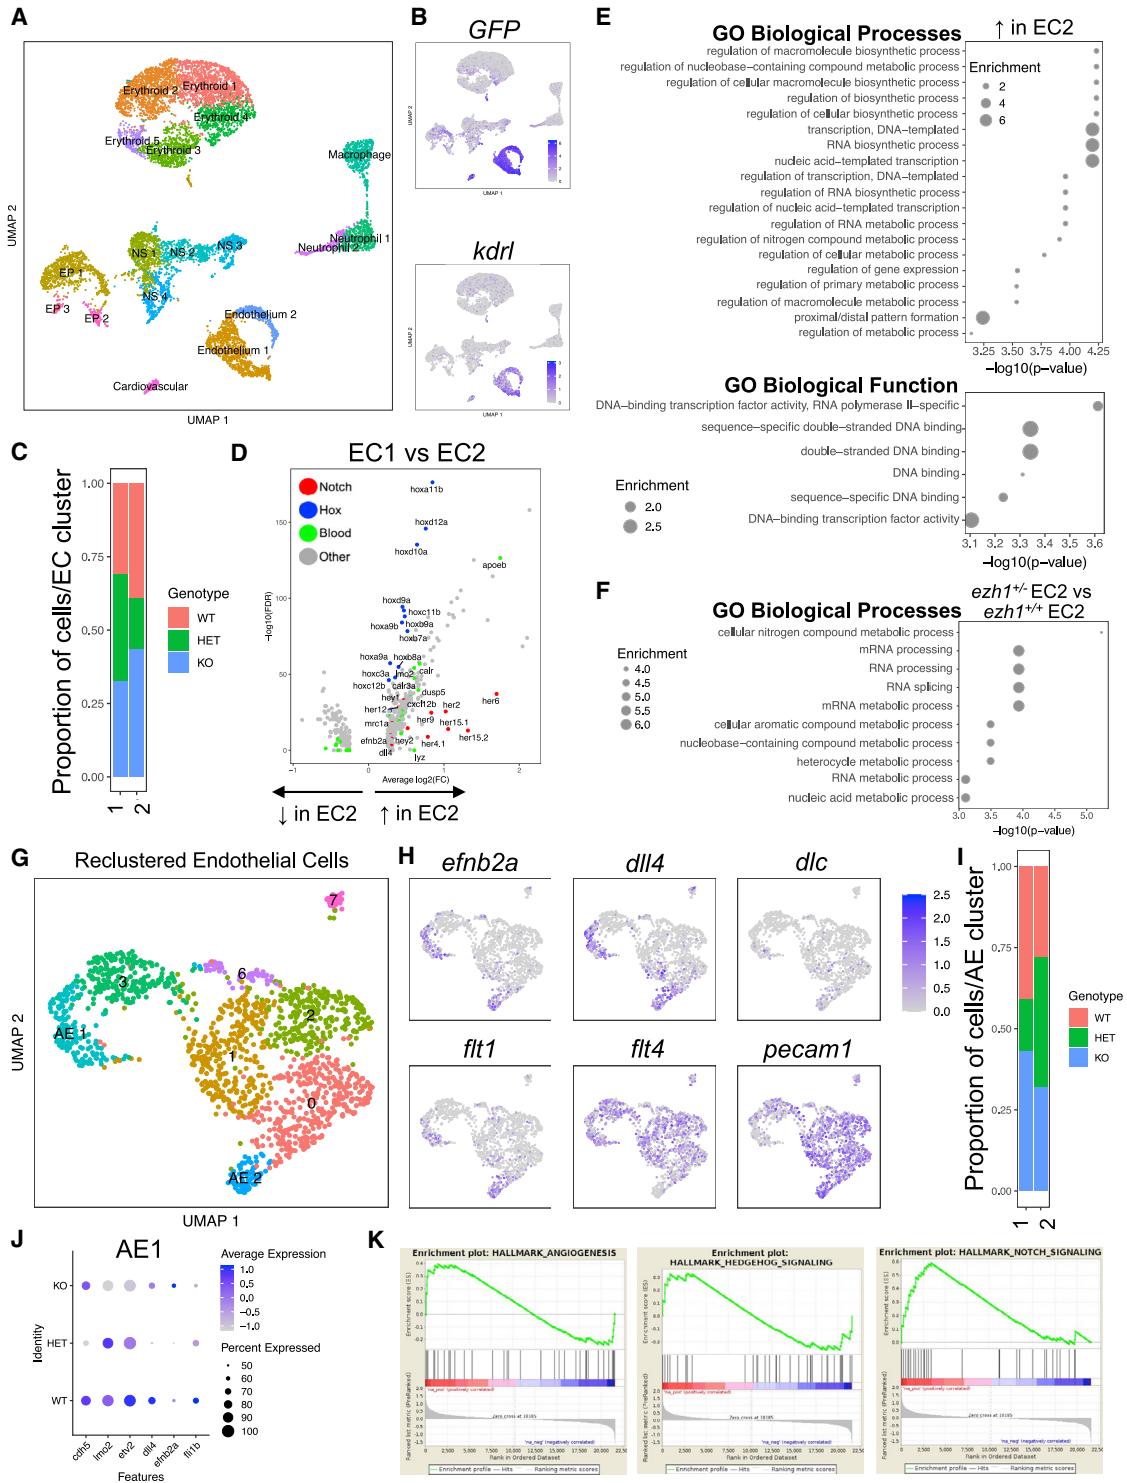

**Figure 5. Single-cell RNA-seq analysis of sorted endothelial cells across *ezh1* genotypes**

(A) UMAP plot and cell-clustering analysis, with 18 distinct clusters identified. NS, nervous system; EP, epithelium.  
 (B) UMAP plots showing *GFP* and *kdrl* expression across sorted cell types.  
 (C) Proportion of *ezh1*<sup>+/+</sup> (WT), *ezh1*<sup>+/-</sup> (HET), and *ezh1*<sup>-/-</sup> (KO) cells in EC1 and EC2.

(legend continued on next page)



(Figures S6A and S6B), consistent with an essential sequential role for Notch in both arterial and HE specification (Butko et al., 2016). To determine whether Notch activity was affected following *ezh1* loss, we performed time-course qPCR analysis, which revealed gradual decreases in arterial *dll4* expression in *ezh1* morphants mirrored by an upregulation of the Notch hematopoietic ligand, *jag1a*, and receptor, *notch1a* (Figure S6C). Intriguingly, WISH on *Tg(EPV:Tp1-MmuHbb:EGFP)* (*Notch:GFP<sup>+</sup>*) reporter embryos showed decreased expression in neural tissue and arterial-derived intersomitic vessels in *ezh1* morphant embryos, while *GFP* was enhanced in the ventral wall of the DA at 36 hpf (Figures S6D and S6E). Likewise, *jag1a* and *notch1a* expression remained significantly increased by qPCR in *ezh1* morphants during HSPC formation (Figure S6F). The relative increase in Notch activity in the DA was specific to *ezh1*-MO, as chemical inhibition of Ezh2 abolished *GFP* globally by WISH (Figures S6G and S6H), as well as expression of Notch pathway components by qPCR at 36 hpf (Figure S6I). This effect was specific to the window of HSPC emergence, as both Notch activity and gene expression were unperturbed by Ezh2 inhibition at 24 hpf by WISH and qPCR (Figures S6J and S6K), reflective of phenotypically normal arterial and HE development.

Decreased HSPC formation as a result of Notch signaling perturbation can be rescued by induction of the *notch1a* intracellular domain (NICD) (Burns et al., 2005). Interestingly, despite indications that Ezh1/2 influence Notch ligand and receptor expression dynamics to regulate HSPC formation, temporal induction of ligand-independent Notch activation at 30 hpf in *Tg(hsp70l:1xMYC-notch1a-intra)<sup>fb12</sup>* embryos (Zhao et al., 2014) was unable to overcome the effect of *ezh1*-OE as determined by *runx1* WISH at 36 hpf (Figures 6E and 6F). This failure appeared to reflect depletion of the specified HE population following *ezh1*-OE (Figures 6G, S6L, and S6M). PRC2-EZH1 was recently implicated in positive regulation of pro-angiogenic factors, such as *DLL4*, in cultured endothelial cells upon VEGFA stimulation *in vitro* (Chen et al., 2020). To determine whether the overall decrease in HSPC and HE formation observed with *ezh1*-OE resulted

from forced retention of the arterial program, we profiled *ephrinb2a* and *dll4* expression, whereby *ezh1*-OE embryos showed a significant increase in arterial marker expression by WISH and qPCR (Figures 6H–6J). Altogether, our data indicate that Ezh1-associated positive regulation of arterial cell fate in the DA serves to antagonize subsequent hemogenic commitment, such that targeted knockdown allows for enhanced HSPC production.

## DISCUSSION

While critical regulators of HSPC formation are increasingly known across vertebrate species, the molecular mechanisms that broadly regulate the switch to HE specification from arterial-fated endothelium remain largely undefined. Here, we have elucidated the mechanistic role by which *ezh1* functions to restrict hematopoietic fate acquisition via maintenance of arterial identity. The endothelium itself serves as the cellular precursor to HSPC emergence, with derivation of multilineage hematopoietic progenitors from HE restricted to arterial vessels (Zovein et al., 2008; Bertrand et al., 2010; Boisset et al., 2010; Kissa and Herbolme, 2010; Bonkhofer et al., 2019). Despite *in vitro* studies postulating that HE and HSPC formation may be uncoupled from AE specification (Ditadi et al., 2015), our data reinforce the concept that arterial identity is a functional prerequisite to HSPC formation *in vivo* (Bonkhofer et al., 2019; Chen et al., 2016; Gering and Patient, 2005; Lizama et al., 2015) and further indicates that targeted repression of previously specified arterial fate, via *ezh1* loss, favors the transition to hematopoietic commitment.

Our prior work proposed that HSPC multipotency was restricted in embryonic murine and human systems by canonical EZH1-PRC2 occupancy at poised bivalent HSPC- and lymphoid-specific loci. We also noted enrichment of non-canonical EZH1 regulation of immune gene targets (Vo et al., 2018). Here, in the zebrafish model, we demonstrate that upon knockdown of *ezh1* there is an increase in phenotypic HSPCs as a result of enhanced HE commitment, occurring at the expense of AE maintenance in the ventral

(D) Volcano plot displaying the pattern of gene expression values for EC2 relative to EC1. Selected genes are indicated based on significance.

(E) GO enrichment for Biological Process (upper) and Functions (lower) associated with upregulated genes in EC2.

(F) GO enrichment analysis for *ezh1*<sup>+/-</sup> EC2 versus *ezh1*<sup>+/+</sup> EC2 sorted endothelial cells.

(G) UMAP plot and reclustering analysis on EC clusters, with eight distinct clusters identified. AE, arterial endothelium.

(H) UMAP plots showing localization of arterial markers *efnb2a*, *dll4*, *dlc*, and *flt1*, as well as the venous marker *flt4* and pan-endothelial marker *pecam1* in AE1 and AE2.

(I) Proportion of *ezh1*<sup>+/+</sup>, *ezh1*<sup>+/-</sup>, and *ezh1*<sup>-/-</sup> cells in AE1 and AE2.

(J) Dot plot of differentially expressed vascular genes for each genotype.

(K) GSEA of day 28 CD34<sup>+</sup>CD38<sup>-</sup> HSPCs 5F plus shEZH1 compared with 5F plus shLUC cells from Vo et al. (2018) (n = 10 shEZH1, 8 shLUC samples).

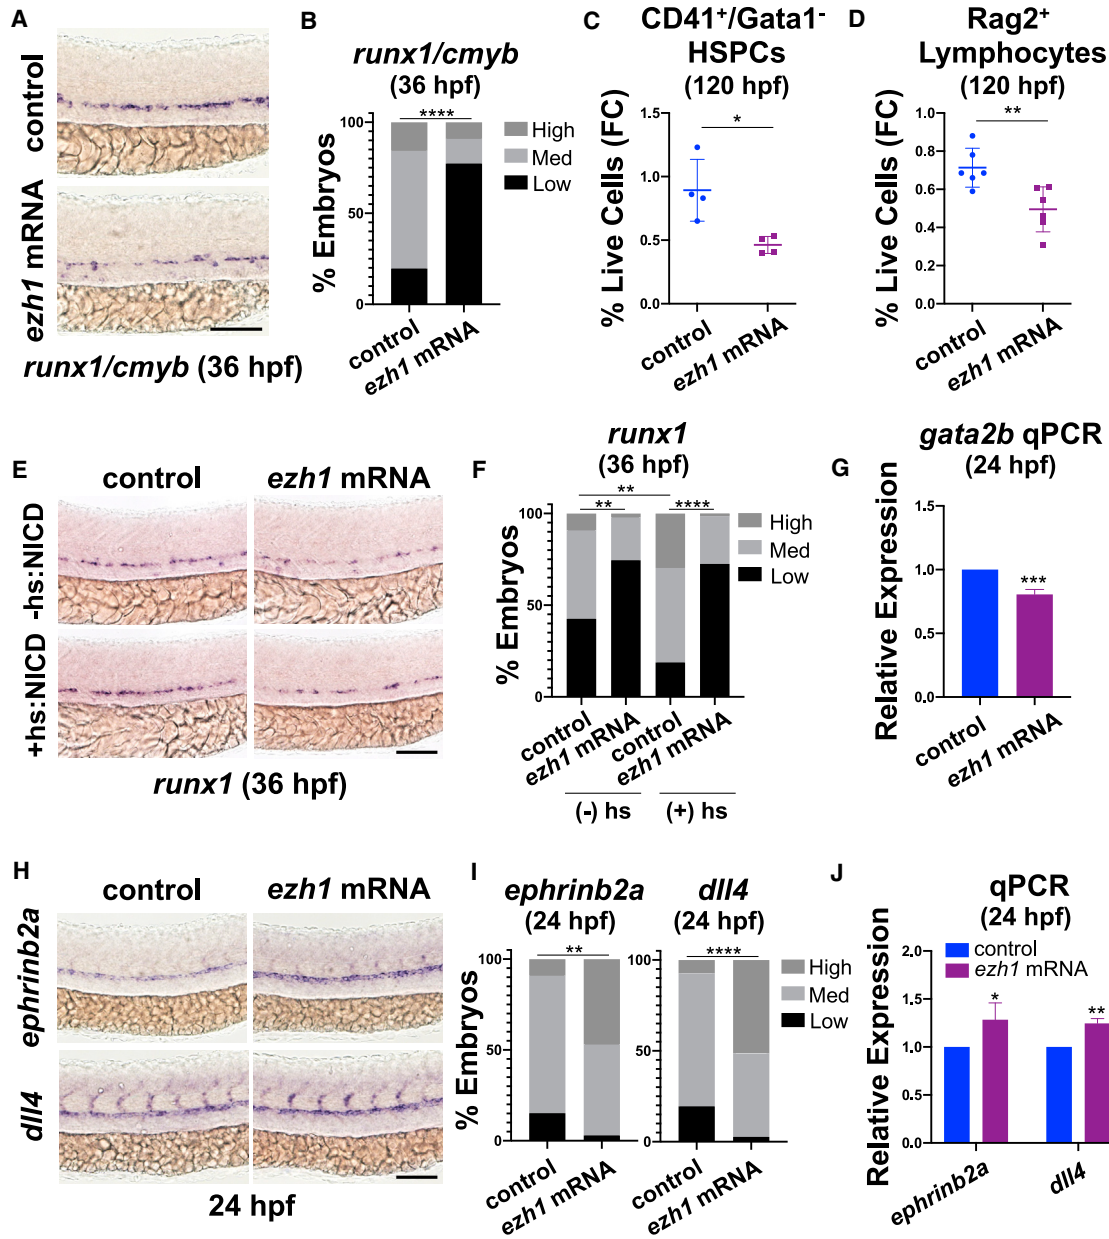

**Figure 6. Ezh1 promotes the arterial program thereby restricting hematopoietic commitment**

(A) WISH for *runx1/cmyb* at 36 hpf in control and *ezh1* mRNA-injected embryos. Scale bar, 100  $\mu$ m.  
 (B) Qualitative phenotypic distribution plot of embryos in (A) (n = 51 control, 44 *ezh1* mRNA-injected embryos; \*\*\*\*p < 0.0001).  
 (C) Flow cytometry (FC) on CD41:GFP<sup>+</sup>/Gata1:dsRed<sup>-</sup> gated on percentage of live cells at 120 hpf in control and *ezh1* mRNA-injected embryos (n = 5 embryos/sample  $\times$  4 biological replicates; two-tailed unpaired Student's t test, \*p < 0.05. Error bars indicate SD).  
 (D) Flow cytometry (FC) for Rag2:GFP<sup>+</sup> gated on percentage of live cells at 120 hpf in control and *ezh1* mRNA-injected embryos (n = 5 embryos/sample  $\times$  6 biological replicates; two-tailed unpaired Student's t test, \*\*p < 0.01. Error bars indicate SD).  
 (E) WISH for *runx1* at 36 hpf in control and *ezh1* mRNA-injected Hsp70:NICD embryos  $\pm$  heat shock at 30 hpf. Scale bar, 100  $\mu$ m.  
 (F) Qualitative phenotypic distribution plot of embryos in (E) (n  $\geq$  47 embryos/condition; \*\*p < 0.01, \*\*\*\*p < 0.0001).  
 (G) Whole-embryo *gata2b* qPCR on control and *ezh1* mRNA-injected embryos at 24 hpf relative to 18s (n  $\geq$  25 embryos/sample  $\times$  3 replicate clutches; two-tailed unpaired Student's t test, \*\*\*p < 0.001. Mean  $\pm$  SEM).  
 (H) WISH for *ephrinb2a* and *dll4* at 24 hpf in control and *ezh1* mRNA-injected embryos.  
 (I) Qualitative phenotypic distribution plot of embryos in (H) (n  $\geq$  47 embryos/condition; \*\*p < 0.01, \*\*\*\*p < 0.0001).  
 (J) qPCR (24 hpf) for *ephrinb2a* and *dll4* relative to 18s (n  $\geq$  25 embryos/sample  $\times$  3 replicate clutches; two-tailed unpaired Student's t test, \*p < 0.05, \*\*p < 0.01).

(legend continued on next page)

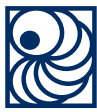

wall of the DA. Consistent with recently published data (Chen et al., 2020) and GREAT (Genomic Regions Enrichment of Annotations Tool) analysis of ATAC (Assay for Transposase-Accessible Chromatin) peaks in mouse *Ezh1*<sup>+/-</sup> and *Ezh1*<sup>-/-</sup> compared with WT AGM (Vo et al., 2018), we postulate that *ezh1* promotes arterial identity by positively regulating expression of the Notch ligand *dll4*, which in turn restricts HE and subsequent HSPC fate. This is reminiscent of murine data where *Dll4*<sup>+</sup> aortic ECs negatively regulate HE recruitment to hematopoietic clusters (Porcheri et al., 2020). In support of this notion, upon *ezh1*-MO we find downregulation of the arterial marker, *dll4*, and upregulation of hematopoietic *jag1a*, which presumably interacts with Notch1a to govern HSPC formation (Espín-Palazón et al., 2014). Compelling reports by the Bigas group suggest that high Notch signal strength via *Dll4* confers endothelial identity, and that silencing of the endothelial program—in favor of hematopoietic fate—is mediated by low Notch signal strength via *Jag1* (Gama-Norton et al., 2015). Whether *Ezh1* directly or indirectly controls Notch gene regulation remains to be investigated, however, we propose *Ezh1* function is normally essential to actively block commitment of AE toward hemogenic fate by maintaining arterial gene expression. Precisely how *Ezh1* expression is controlled within select cells of the aortic endothelial niche will be of significant interest for further exploration.

In the context of red blood cell (RBC) differentiation from HSPCs, *EZH1* expression is significantly upregulated as *EZH2* expression is diminished at the control of a GATA2-to-GATA1 switch (Xu et al., 2015). Upon RBC differentiation, non-canonical PRC2 is composed of *EZH1*-*SUZ12* to activate lineage-specific gene transcription (Xu et al., 2015). While PRC2 function has been explored in HSPC maintenance and differentiation, we propose alternative functions of *Ezh1* and *Ezh2* in HSPC specification from AE *in vivo*: pharmacological inhibition of *Ezh2* did not affect arterial maintenance or HE specification, whereas *ezh1* loss impaired arterial identity. Interestingly, despite the increasing number of HE cells transitioning from arterial-fated endothelium associated with *ezh1* loss, *Ezh2* function was subsequently required for increased HSPC formation. This indicates that *Ezh1* and *Ezh2* do not play redundant or antagonistic roles in HE specification/HSPC formation, but rather “hand off” regulatory activity in this context. In addition to observing a marked downregulation in *ezh2* expression in AE cells compared with the non-endothelial and HSPC fractions, we noted an unexpected increase in

*ezh2* expression with loss of *ezh1*, similar to that described in a recent study (Völkel et al., 2019). Whether this is due to direct regulation of the *ezh2* loci by *Ezh1* or simply reflective of increased HSPCs has not been fully explored, but will be an important area of future study.

While not investigated here, our *in vitro* bioinformatics analysis also revealed an intriguing role for inflammatory signaling in HSPC formation in the context of *EZH1* knockdown (Figure S5F). Our laboratory and others have shown that sterile inflammatory signaling regulates HSPC formation and expansion during development (Espín-Palazón et al., 2014; Frame et al., 2020). Here, we saw an enrichment in inflammatory pathways, including interferon- $\alpha$  (IFN $\alpha$ ), IFN $\gamma$ , and tumor necrosis factor  $\alpha$  (TNF $\alpha$ ) following knockdown of *EZH1*; whether this is due to active *EZH1* repression or simply reflective of an increase in committed HSPCs remains to be elucidated. Alternatively, inflammatory signaling may be directly antagonizing *ezh1* expression and/or function to promote the transition to HE and, later, HSPC fate. TNF $\alpha$  has previously been implicated in regulating HSPC number in fish, in part, by activation of the Notch pathway through *jag1a* (Espín-Palazón et al., 2014). It will be interesting to determine whether overexpression of inflammatory components is sufficient to antagonize or block the ability of *Ezh1* to maintain arterial fate or regulate *Ezh2* expression.

Understanding how HSPCs are specified from mesodermal precursors is essential to the goal of generating patient-specific HSPCs capable of multipotent long-term function. Our study highlights the role of the epigenetic factor, *Ezh1*, in regulating the ability of AE to acquire hematopoietic competence. Furthermore, our data have demonstrated a need to not only downregulate *ezh1* but to additionally ensure *Ezh2* function in order to promote the definitive hematopoietic program. Further characterization of upstream regulators of *Ezh1* and *Ezh2*, as well as investigation of the positive and negative regulatory regions each occupies, will be informative for further optimizing current differentiation platforms aimed at producing patient-specific HSPCs for curative purposes.

## EXPERIMENTAL PROCEDURES

### Animal models

Zebrafish (see supplemental experimental procedures) were utilized in accordance with approvals from the Beth Israel Deaconess Medical Center and Boston Children’s Hospital Institutional

(H) WISH for *ephrinb2a* and *dll4* at 24 hpf in control and *ezh1* mRNA-injected embryos. Scale bar, 100  $\mu$ m.

(I) Qualitative phenotypic distribution plot of embryos in (H) ( $n \geq 33$  embryos/condition; \*\* $p < 0.01$ , \*\*\*\* $p < 0.0001$ ).

(J) Whole-embryo *ephrinb2a* and *dll4* qPCR on control and *ezh1* mRNA-injected embryos at 24 hpf relative to 18s ( $n \geq 25$  embryos/sample  $\times 3$  replicate clutches; two-tailed unpaired Student’s *t* test, \* $p < 0.05$ , \*\* $p < 0.01$ . Mean  $\pm$  SEM).



Animal Care and Use Committees. Mice (see [supplemental experimental procedures](#)) were used in accordance with regulations of the Boston Children's Hospital Institutional Animal Care and Use Committee. Overnight mating generated timed pregnancies.

### Zebrafish chemical exposures, WISH, and imaging

Stage-matched embryos were exposed to chemical modulators in 6-well plates containing 5 mL of E3 fish water at the time points indicated. The following compounds (dose, source) were used: GSK126 (1  $\mu$ M, Selleck Chemicals) and DAPT (100  $\mu$ M, Selleck Chemicals). For WISH, embryos were fixed in 4% paraformaldehyde overnight at 4°C, and processed with established protocols and published probes for *runx1*, *cmyb*, *rag1*, *gata2b*, *flk1*, *ephrinb2a*, *dll4*, *dlc*, *gata1*, *pu.1*, *flt4*, and *GFP* (<http://zfin.org/ZFIN/Methods/ThisseProtocol.html>). An *ezh1* probe was generated by amplifying 690 bp of coding sequence from cDNA in a pExpress-1 plasmid (Horizon Discovery) using PCR primers flanked with T7 sequence (see [supplemental experimental procedures](#)) followed by anti-sense/sense probe generation by *in vitro* transcription. Phenotypic variation ( $n \geq 20$  embryos/condition,  $n \geq 3$  replicate clutches) was qualitatively analyzed and graphically depicted as percent of total scored exhibiting high (increased)/ medium (normal)/ low (decreased) expression compared with the median of sibling controls. Heat shock was induced by incubation in a 38°C circulating water bath for 45 min at ~30 hpf; NICD embryos were segregated by blue eyes. WISH images were acquired by a Zeiss Axio Imager A1/Axio Cam MRC using Axiovision LE software. Thymic area was quantified using Fiji software (NIH).

### Fluorescence microscopy

Live embryos were imaged using a Zeiss Discovery V8 microscope with Axiovision LE software; CD41:GFP<sup>+</sup> cells were counted manually using Fiji software. For confocal microscopy, embryos were treated with 0.003% phenylthiourea in E3 and imaged on a Zeiss laser scanning LSM880 inverted confocal microscope after mounting in 3% methylcellulose using the 20  $\times$  0.8 M27 Plan-Apochromat (Zeiss) objective. Image analysis was performed with ImageJ, Fiji, and/or Zen (Zeiss) programs.

### Zebrafish morpholino and mRNA injections

Splice-blocking *ezh1*-MO (GeneTools; see [supplemental experimental procedures](#)) was injected (1-2 nL of 300  $\mu$ M MO) at the 1-cell stage in indicated reporter or AB line, as previously detailed (Cortes et al., 2016). Capped *ezh1*, *dll4*, and *ezh2* mRNA was synthesized from commercially available constructs, linearized or PCR amplified with the SP6 promoter sequence (Horizon Discovery; see [supplemental experimental procedures](#)) using the mMessage mMachine SP6 Kit (Invitrogen) and injected (300 ng/ $\mu$ L) at the 1-cell stage. Injected embryos were stage-matched to control siblings.

### RNA isolation, cDNA synthesis, and qPCR

RNA was isolated from whole pooled embryos ( $n \geq 25$  embryos/condition) using the RNeasy Total RNA Isolation Kit (Invitrogen) and DNase-treated using the TURBO DNA-free Kit (Invitrogen). cDNA was synthesized from 1  $\mu$ g of total RNA using SuperScript III First-Strand Synthesis SuperMix for qPCR (Invitrogen).

For sorted cells, RNA was isolated using a RNeasy Micro Kit (Qiagen) with DNase applied directly on the column in accordance with the manufacturer's instructions. cDNA was synthesized using a SuperScript VILO cDNA Synthesis Kit (Invitrogen). Quantitative real-time PCR was performed with SYBR Green PCR Master Mix (Applied Biosystems) on an ABI7900 (Applied Biosystems); triplicate samples from  $n \geq 3$  clutches were run using published primers (see [supplemental experimental procedures](#)).

### Zebrafish embryo dissociation and flow cytometry

Pools of embryos/larvae were dissociated by Liberase (Sigma) treatment (75  $\mu$ g/mL in 1  $\times$  PBS/1 mM EDTA) in a 34°C circulating water bath and resuspended in 1  $\times$  PBS/1 mM EDTA. FACS was performed on an LSRFortessa (BD) with five fish per data point. Flk1<sup>-</sup>/Flt1<sup>-</sup>, Flk1<sup>+</sup>/Flt1<sup>-</sup>, Flk1<sup>+</sup>/Flt1<sup>+</sup>, Gata2b<sup>+</sup>, and Flk1<sup>+</sup>/cMyb<sup>+</sup> cells were sorted ( $n \geq 20$  embryos/sample across  $n \geq 3$  replicate sorts) on a FACSaria II (BD) into 1  $\times$  PBS containing 2% fetal bovine serum. Prior to analysis, cells were labeled with 5 nM SYTOX Red dead cell stain (Thermo Fisher Scientific), as described by Cortes et al. (2016). Data were analyzed using FlowJo X Software (BD).

### Mouse yolk sac dissociation and flow cytometry

Individual yolk sacs were incubated in 100  $\mu$ L of 0.125% Type I collagenase (Sigma) at 37°C for 15 min, diluted and pipetted 20 $\times$  with 250  $\mu$ L of 1  $\times$  PBS/1 mM EDTA, and digested an additional 15 min. Samples were pipetted 20-30 $\times$ , diluted with 250  $\mu$ L of 1  $\times$  PBS/1 mM EDTA, and filtered to single-cell suspension. Cells were blocked with 10% normal rat serum (15 min) and incubated with CD117 APC-eFluor 780 (eBioscience), CD41a PE-Cy7 (eBioscience), CD16/32 PE (eBioscience), and Ter119 APC (BD) antibodies (1:100) for 20 min on ice. Cells were washed, stained with 4,6-diamidino-2-phenylindole (DAPI; 5  $\mu$ g/mL), and analyzed with an LSRII cytometer (BD). Data were analyzed using FlowJo X Software (BD).

### scRNA-seq and data analysis

Single-cell collection and scRNA-seq were performed according to manufacturers' protocols, using established platforms and custom analysis tools (see [supplemental experimental procedures](#) for additional details).

### Quantification and statistical analysis

Statistical analyses were performed using GraphPad Prism 8 using mean  $\pm$  SEM values unless otherwise stated. Two-tailed unpaired Student's t test was used for pairwise comparisons, ANOVA for group analyses, chi-squared analysis for significance of WISH distributions (denoted as \* $p < 0.05$ , \*\* $p < 0.01$ , \*\*\* $p < 0.001$ , \*\*\*\* $p < 0.0001$  in figures).

### Data and code availability

The accession number for the scRNA-seq data reported in this paper is Gene Expression Omnibus (GEO): GSE173972.

### SUPPLEMENTAL INFORMATION

Supplemental information can be found online at <https://doi.org/10.1016/j.stemcr.2021.05.014>.



## AUTHOR CONTRIBUTIONS

R.A.S. conceived the study. M.A.T.N. carried out scRNA-seq library preparation and data analysis on sorted endothelial cells across *ezh1* genotypes. M.H. performed EdU labeling and confocal imaging/analysis, and generated capped mRNA for injections. J.M.F. performed cell sorting followed by qPCR for *ezh* expression profiling and *Ezh1* mutant mice work. G.A.Y. and K.S. generated and validated the zebrafish *ezh1* mutant. E.L.d.R. analyzed *in vitro* RNA-seq data for GSEA. R.A.S. performed all other zebrafish experiments. T.E.N. and G.Q.D. gave experimental guidance and reviewed all data. R.A.S. and T.E.N. wrote and edited the manuscript.

## CONFLICTS OF INTEREST

G.Q.D. holds equity interest in True North Therapeutics and 28/7 Therapeutics.

## ACKNOWLEDGMENTS

The authors would like to thank the following: BIDMC confocal imaging core; R. Mathieu and M. Paktinat at the BCH flow cytometry core; Broad Institute Walk-up Sequencing service; R. Monteiro for providing the *dll4*, *dlc*, and *gata2b in situ* probes; A. Siekmann for providing the *Tg(-0.8flt1:tdTomato)*; N. Budrow for zebrafish husbandry; T.L. Long and S. Freeburg for technical assistance; T. Jenuwein for providing the *Ezh1* mouse mutant line; and L. Vo, W. Goessling, C.E. Burns, V. Sankaran, I. Drummond, and D. Bauer for experimental guidance and thoughtful discussion. This work was supported by a Leukemia and Lymphoma Society Scholar award (T.E.N.), and the National Institutes of Health: F31AR071283 (G.A.Y.), R01HL152636 (T.E.N.), U01HL134812 (G.Q.D., T.E.N.), R01DK098241 (T.E.N.), R24DK092760 (G.Q.D., T.E.N.) and RC2DK120535 (G.Q.D., T.E.N.). The graphical abstract was created using [Biorender.com](https://biorender.com).

Received: June 17, 2020

Revised: May 18, 2021

Accepted: May 19, 2021

Published: June 17, 2021

## REFERENCES

Alharbi, R.A., Petterngell, R., Pandha, H.S., and Morgan, R. (2013). The role of *HOX* genes in normal hematopoiesis and acute leukemia. *Leukemia* *27*, 1000–1008.

Allis, C.D., and Jenuwein, T. (2016). The molecular hallmarks of epigenetic control. *Nat. Rev. Genet.* *17*, 487–500.

Bertrand, J.Y., Kim, A.D., Violette, E.P., Stachura, D.L., Cisson, J.L., and Traver, D. (2007). Definitive hematopoiesis initiates through a committed erythromyeloid progenitor in the zebrafish embryo. *Development* *134*, 4147–4156.

Bertrand, J.Y., Chi, N.C., Santoso, B., Teng, S., Stainer, D.Y., and Traver, D. (2010). Haematopoietic stem cells derive directly from aortic endothelium during development. *Nature* *464*, 108–111.

Boisset, J.C., van Cappellen, W., Andrieu-Soler, C., Galjart, N., Dzierzak, E., and Robin, C. (2010). *In vivo* imaging of haematopoietic cells emerging from the mouse aortic endothelium. *Nature* *464*, 116–120.

Bonkhofner, F., Rispoli, R., Pinheiro, P., Krecsmarik, M., Schneider-Swales, J., Tsang, I.H.C., de Bruijn, M., Monteiro, R., Peterkin, T., and Patient, R. (2019). Blood stem cell-forming haemogenic endothelium in zebrafish derives from arterial endothelium. *Nat. Commun.* *10*, 3577.

Burns, C.E., Traver, D., Mayhall, E., Shepard, J.L., and Zon, L.I. (2005). Hematopoietic stem cell fate is established by the Notch-Runx pathway. *Genes Dev.* *19*, 2331–2342.

Butko, E., Distel, M., Pouget, C., Weijs, B., Kobayashi, I., Ng, K., Mosimann, C., Poulain, F.E., McPherson, A., Ni, C.W., et al. (2015). *Gata2b* is a restricted early regulator of hemogenic endothelium in the zebrafish embryo. *Development* *142*, 1050–1061.

Butko, E., Pouget, C., and Traver, D. (2016). Complex regulation of HSC emergence by the Notch signaling pathway. *Dev. Biol.* *409*, 129–138.

Carroll, K.J., Esain, V., Garnaas, M.K., Cortes, M., Dovey, M.C., Nissim, S., Frechette, G.M., Liu, S.Y., Kwan, W., Cutting, C.C., et al. (2014). Estrogen defines the dorsal ventral limit of VEGF regulation to specify the location of the hemogenic endothelial niche. *Dev. Cell* *29*, 437–453.

Chen, I.I., Caprioli, A., Ohnuki, H., Kwak, H., Porcher, C., and Tosato, G. (2016). EphrinB2 regulates the emergence of a hemogenic endothelium from the aorta. *Sci. Rep.* *6*, 27195.

Chen, J., Liang, X., Zhang, S., Wang, S., Garcia, S.P., Yan, P., Yu, H., Li, Z., Liu, L., Zhang, F., et al. (2020). Two faces of bivalent domain regulate VEGFA responsiveness and angiogenesis. *Cell Death Dis.* *11*, 75.

Cortes, M., Chen, M.J., Stachura, D.L., Liu, S.Y., Kwan, W., Wright, F., Vo, L.T., Theodore, L.N., Esain, V., Frost, I.M., et al. (2016). Developmental vitamin D availability impacts hematopoietic stem cell production. *Cell Rep.* *17*, 458–468.

Dejana, E., Hirschi, K.K., and Simons, M. (2017). The molecular basis of endothelial cell plasticity. *Nat. Commun.* *8*, 14361.

Ditadi, A., Sturgeon, C.M., Tober, J., Awong, G., Kennedy, M., Yzaguirre, A.D., Azzola, L., Ng, E.S., Stanley, E.G., French, D.L., et al. (2015). Human definitive haemogenic endothelium and arterial vascular endothelium represent distinct lineages. *Nat. Cell Biol.* *17*, 580–591.

Dobrzycki, T., Mahony, C.B., Krecsmarik, M., Koyunlar, C., Rispoli, R., Peulen-Zink, J., Gussinklo, K., Fedlaoui, B., de Pater, E., Patient, R., et al. (2020). Deletion of a conserved *Gata2* enhancer impairs haemogenic endothelium programming and adult zebrafish hematopoiesis. *Commun. Biol.* *3*, 71.

Dupret, B., Völkel, P., Vennin, C., Toillon, R.-A., Bourhis, X.L., and Angrand, P.-O. (2017). The histone lysine methyltransferase *Ezh2* is required for maintenance of the intestine integrity and for caudal fin regeneration in zebrafish. *Biochim. Biophys. Acta* *1860*, 1079–1093.

Eden, E., Navon, R., Steinfeld, I., Lipson, D., and Yakhini, Z. (2009). GOrilla: a tool for discovery and visualization of enriched GO terms in ranked gene lists. *BMC Bioinformatics* *10*, 48.

Espín-Palazón, R., Stachura, D.L., Campbell, C.A., García-Moreno, D., Del Cid, N., Kim, A.D., Candel, S., Meseguer, J., Mulero, V., and

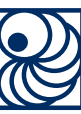

- Traver, D. (2014). Proinflammatory signaling regulates hematopoietic stem cell emergence. *Cell* 159, 1070–1085.
- Frame, J.M., McGrath, K.E., and Palis, J. (2013). Erythro-myeloid progenitors: “definitive” hematopoiesis in the conceptus prior to the emergence of hematopoietic stem cells. *Blood Cells Mol. Dis.* 51, 220–225.
- Frame, J.M., Kubaczka, C., Long, T.L., Esain, V., Soto, R.A., Hachimi, M., Jing, R., Shwartz, A., Goessling, W., Daley, G.Q., et al. (2020). Metabolic regulation of inflammasome activity controls embryonic hematopoietic stem and progenitor cell production. *Dev. Cell* 55, 133–149.
- Gama-Norton, L., Ferrando, E., Ruiz-Herguido, C., Liu, Z., Guiu, J., Islam, A.B., Lee, S.-U., Yan, M., Guidos, C.J., López-Bigas, N., et al. (2015). Notch signal strength controls cell fate in the haemogenic endothelium. *Nat. Comm.* 6, 8510.
- Gao, X., Johnson, K.D., Chang, Y.-I., Boyer, M.E., Dewey, C.N., Zhang, J., and Bresnick, E.H. (2013). Gata2 cis-element is required for hematopoietic stem cell generation in the mammalian embryo. *J. Exp. Med.* 210, 2833–2842.
- Gao, P., Chen, C., Howell, E.D., Li, Y., Tober, J., Uzun, Y., He, B., Gao, L., Zhu, Q., Siekmann, A.K., et al. (2020). Transcriptional regulatory networks controlling the ontogeny of hematopoietic stem cells. *Genes Dev.* 34, 950–964.
- Geling, A., Steiner, H., Willem, M., Bally-Cuif, L., and Haass, C. (2002). A gamma-secretase inhibitor blocks Notch signaling in vivo and causes a severe neurogenic phenotype in zebrafish. *EMBO Rep.* 3, 688–694.
- Gering, M., and Patient, R. (2005). Hedgehog signaling is required for adult blood stem cell formation in zebrafish embryos. *Dev. Cell* 8, 389–400.
- Goode, D.K., Obier, N., Vijayabaskar, M.S., Lie-A-Ling, M., Lilly, A.J., Hannah, R., Lichtinger, M., Batta, K., Florkowska, M., Patel, R., et al. (2016). Dynamic gene regulatory networks drive hematopoietic specification and differentiation. *Dev. Cell* 36, 572–587.
- Huang, H.T., Kathrein, K.L., Barton, A., Gitlin, Z., Huang, Y.H., Ward, T.P., Hofmann, O., Dibiasi, A., Song, A., Tyekucheva, S., et al. (2013). A network of epigenetic regulators guides developmental haematopoiesis in vivo. *Nat. Cell Biol.* 15, 1516–1525.
- Kissa, K., and Herbomel, P. (2010). Blood stem cells emerge from aortic endothelium by a novel type of cell transition. *Nature* 464, 112–115.
- Lawson, N.D., Scheer, N., Pham, V.N., Kim, C.-H., Chitnis, A.B., Campos-Ortega, J.A., and Weinstein, B.A. (2001). Notch signaling is required for arterial-venous differentiation during embryonic vascular development. *Development* 128, 3675–3683.
- Lizama, C.O., Hawkins, J.S., Schmitt, C.E., Bos, F.L., Zape, J.P., Cautivo, K.M., Borges Pinto, H., Rhyner, A.M., Yu, H., Donohoe, M.E., et al. (2015). Repression of arterial genes in hemogenic endothelium is sufficient for haematopoietic fate acquisition. *Nat. Commun.* 6, 7739.
- Margueron, R., and Reinberg, D. (2011). The Polycomb complex PRC2 and its mark in life. *Nature* 469, 343–349.
- Margueron, R., Li, G., Sarma, K., Blais, A., Zavadil, J., Woodcock, C.L., Dynlacht, B.D., and Reinberg, D. (2008). Ezh1 and Ezh2 maintain repressive chromatin through different mechanisms. *Mol. Cell* 32, 503–518.
- McGrath, K.E., Frame, J.M., Fegan, K.H., Bowen, J.R., Conway, S.J., Catherman, S.C., Kingsley, P.D., Koniski, A.D., and Palis, J. (2015). Distinct sources of hematopoietic progenitors emerge before HSCs and provide functional blood cells in the mammalian embryo. *Cell Rep.* 11, 1892–1904.
- Monteiro, R., Pinheiro, P., Joseph, N., Peterkin, T., Koth, J., Repapi, E., Bonkhofer, F., Kirmizitas, A., and Patient, R. (2016). Transforming growth factor b drives hemogenic endothelium programming and the transition to hematopoietic stem cells. *Dev. Cell* 38, 358–370.
- Mousavi, K., Zare, H., Wang, A.H., and Sartorelli, V. (2012). Polycomb protein Ezh1 promotes RNA polymerase II elongation. *Mol. Cell* 45, 255–262.
- Nottingham, W.T., Jarratt, A., Burgess, M., Speck, C.L., Cheng, J.-F., Prabhakar, S., Rubin, E.M., Li, P.-S., Sloane-Stanley, J., Kong-A-San, J., et al. (2007). Runx1-mediated hematopoietic stem-cell emergence is controlled by a Gata/Ets/SCL-regulated enhancer. *Blood* 110, 4188–4197.
- O’Carroll, D., Erhardt, S., Pagani, M., Barton, S.C., Surani, M.A., and Jenuwein, T. (2001). The polycomb-group gene Ezh2 is required for early mouse development. *Mol. Cell Biol.* 21, 4330–4336.
- Porcheri, C., Golan, O., Calero-Nieto, F.J., Thambyrajah, R., Ruiz-Herguido, C., Wang, X., Catto, F., Guillén, Y., Sinha, R., González, J., et al. (2020). Notch ligand Dll4 impairs cell recruitment to aortic clusters and limits blood stem cell generation. *EMBO J.* 39, e104270.
- Quillien, A., Moore, J.C., Shin, M., Siekmann, A.F., Smith, T., Pan, L., Moens, C.B., Parsons, M.J., and Lawson, N.D. (2014). Distinct Notch signaling outputs patterns the developing arterial system. *Development* 141, 1544–1552.
- Robert-Moreno, A., Espinosa, L., de la Pompa, J.L., and Bigas, A. (2005). RBPjkappa-dependent Notch function regulates Gata2 and is essential for the formation of intra-embryonic hematopoietic cells. *Development* 132, 1117–1126.
- Rowe, R.G., Mandelbaum, J., Zon, L.I., and Daley, G.Q. (2016). Engineering hematopoietic stem cells: lessons from development. *Cell Stem Cell* 18, 707–720.
- San, B., Chrispijn, N.D., Wittkopp, N., van Heeringen, S.J., Lagendijk, A.K., Aben, M., Bakkers, J., Ketting, R.F., and Kamminga, L.M. (2016). Normal formation of a vertebrate body plan and loss of tissue maintenance in the absence of ezh2. *Sci. Rep.* 6, 24658.
- San, B., Aben, M., Elurbe, D.M., Voeltzke, K., Den Broeder, M.J., Rougeot, J., Legler, J., and Kamminga, L.M. (2018). Genetic and epigenetic regulation of zebrafish intestinal development. *Epigenomes* 2, 19.
- Slukvin, I.I., and Uenishi, G.I. (2019). Arterial identity of hemogenic endothelium: a key to unlock definitive hematopoietic commitment in human pluripotent stem cell cultures. *Exp. Hematol.* 71, 3–12.
- Vo, L.T., Kinney, M.A., Liu, X., Zhang, Y., Barragan, J., Sousa, P.M., Jha, D.K., Han, A., Cesana, M., Shao, Z., et al. (2018). Regulation of





- embryonic haematopoietic multipotency by EZH1. *Nature* 553, 506–510.
- Völkel, P., Bary, A., Raby, L., Chapart, A., Dupret, B., Bourhis, X.L., and Angrand, P.-O. (2019). Ezh1 arises from Ezh2 gene duplication but its function is not required for zebrafish development. *Sci. Rep.* 9, 4319.
- Xu, J., Shao, Z., Li, D., Xie, H., Kim, W., Huang, J., Taylor, J.E., Pinello, L., Glass, K., Jaffe, J.D., et al. (2015). Developmental control of Polycomb subunit composition by GATA factors mediates a switch to non-canonical functions. *Mol. Cell* 57, 304–316.
- Yette, G.A., Stewart, S., and Stankunas, K. (2021). Zebrafish Polycomb repressive complex-2 critical roles are largely Ezh2- over Ezh1-driven and concentrate during early embryogenesis. *BioRxiv* <https://doi.org/10.1101/2020.12.31.424918>.
- Yzaguirre, A.D., de Bruijn, M.F.T.R., and Speck, N.A. (2017). The role of Runx1 in embryonic blood cell formation. *Adv. Exp. Med. Biol.* 962, 47–64.
- Zhao, L., Borikova, A.L., Ben-Yair, R., Guner-Ataman, B., MacRae, C.A., Lee, R.T., Burns, C.G., and Burns, C.E. (2014). Notch signaling regulates cardiomyocyte proliferation during zebrafish heart regeneration. *PNAS*, 1403–1408.
- Zovein, A.C., Hofmann, J.J., Lynch, M., French, W.J., Turlo, K.A., Yang, Y., Becker, M.S., Zanetta, L., Dejana, E., Gasson, J.C., et al. (2008). Fate tracing reveals the endothelial origin of hematopoietic stem cells. *Cell Stem Cell* 3, 625–636.

**Stem Cell Reports, Volume 16**

**Supplemental Information**

**Sequential regulation of hemogenic fate and hematopoietic stem and progenitor cell formation from arterial endothelium by Ezh1/2**

**Rebecca A. Soto, Mohamad Ali T. Najia, Mariam Hachimi, Jenna M. Frame, Gabriel A. Yette, Edroaldo Lummertz da Rocha, Kryn Stankunas, George Q. Daley, and Trista E. North**

Figure S1 related to Figure 1.

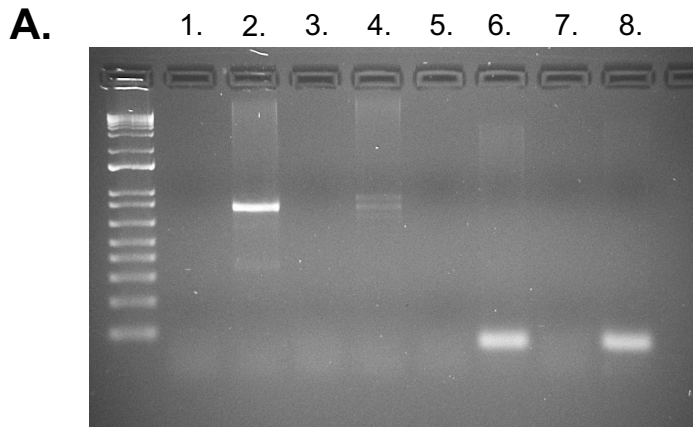

**PCR gel key:**

- |                       |                       |
|-----------------------|-----------------------|
| 1. control -RT        | 5. control -RT        |
| 2. control +RT        | 6. control +RT        |
| 3. <i>ezh1</i> MO -RT | 7. <i>ezh1</i> MO -RT |
| 4. <i>ezh1</i> MO +RT | 8. <i>ezh1</i> MO +RT |
- \_\_\_\_\_ *ezh1*                      \_\_\_\_\_ *beta-actin*

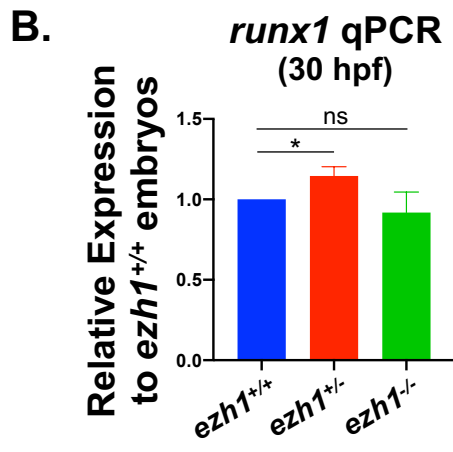

**Figure S1. *ezh1* loss increases HSPC formation, related to Figure 1**

(A) Assessment of *ezh1* splice blocking MO efficacy by PCR on cDNA prepared from 30 hpf control and *ezh1* morphant RNA. Reference gene: *b-actin*.

(B) Whole-embryo *runx1* qPCR on *ezh1*<sup>+/+</sup>, *ezh1*<sup>+/-</sup>, and *ezh1*<sup>-/-</sup> embryos at 30 hpf relative to 18s, normalized to average dCT of *ezh1*<sup>+/+</sup> replicate clutches (n ≥ 25 embryos/sample x 3 replicate clutches; two-tailed unpaired Student's t test, \*p < 0.05. Mean ± SEM).

Figure S2 related to Figure 2.

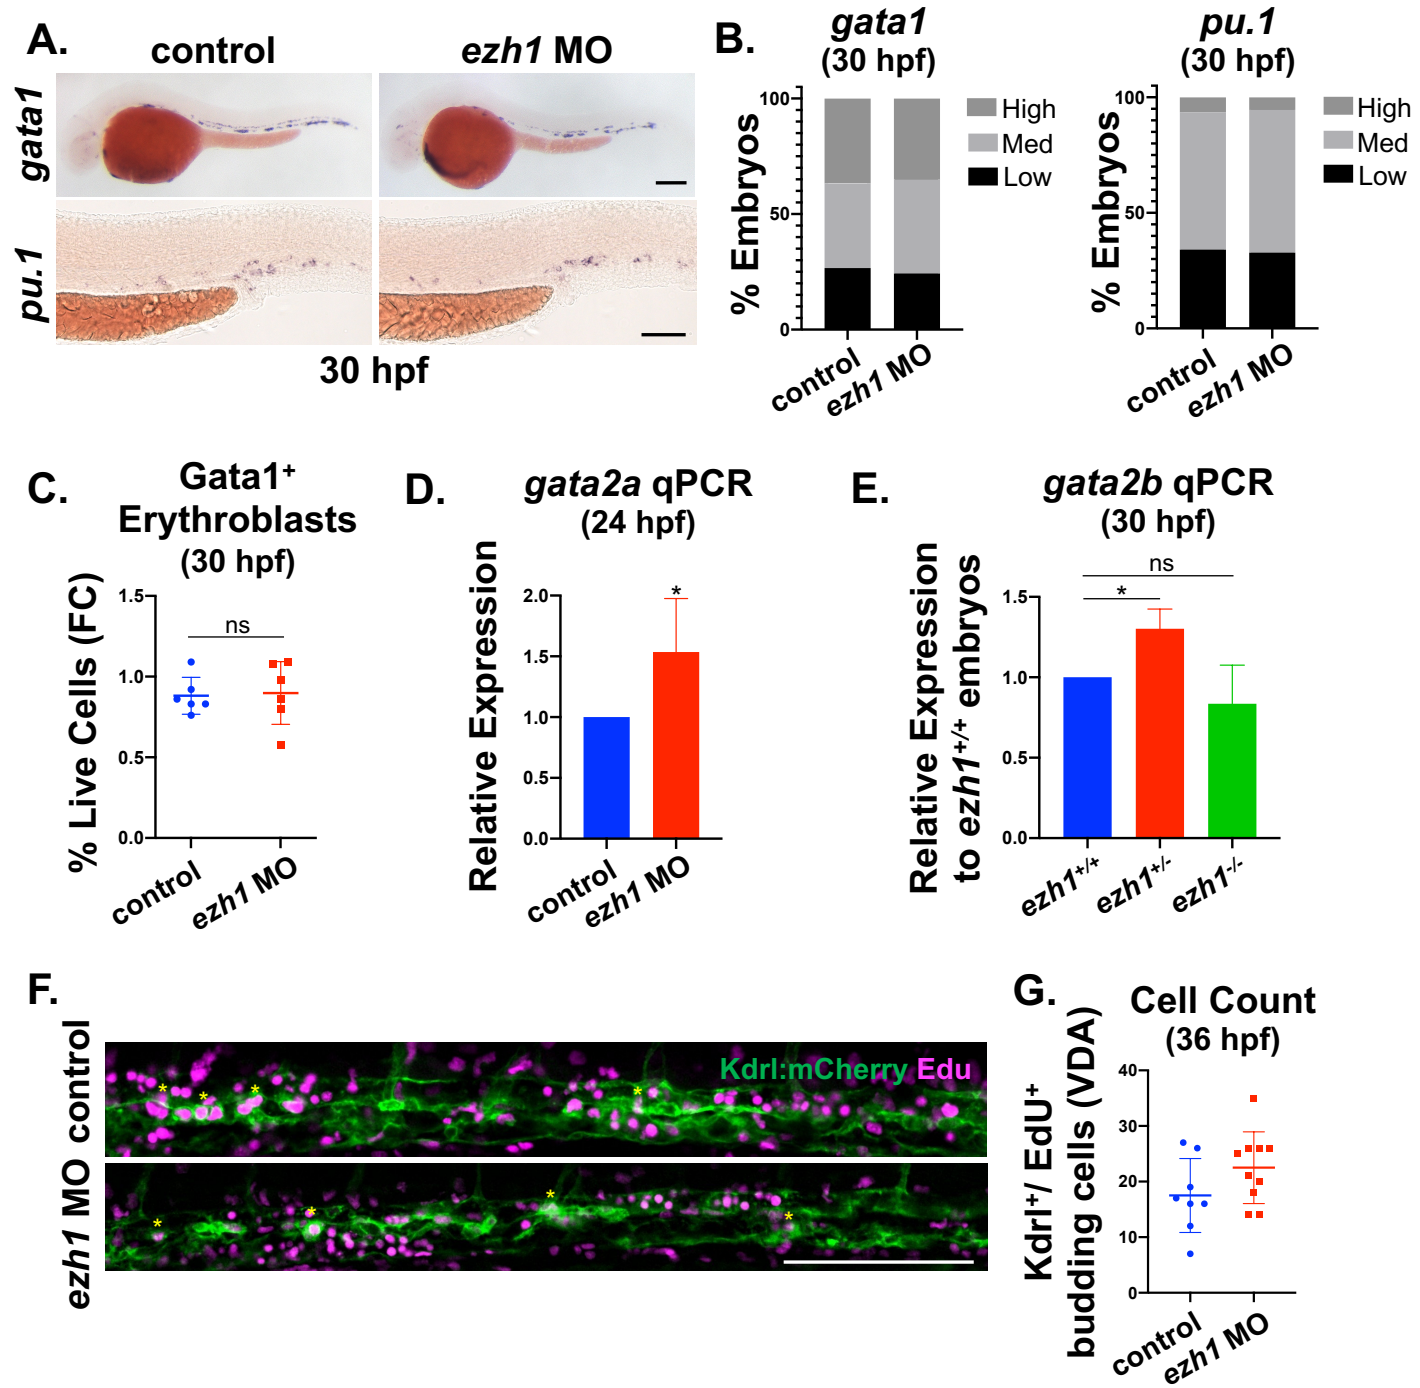

**Figure S2. Primitive erythroid and myeloid cells appear phenotypically normal in *ezh1* morphants, related to Figure 2**

(A) WISH for *gata1* (upper panels; Scale bar, 200  $\mu$ m) and *pu.1* (lower panels; Scale bar, 100  $\mu$ m) at 30 hpf in control and *ezh1* morphants.

(B) Qualitative phenotypic distribution plot of *gata1* embryos in (A) (n = 30 control, 37 *ezh1* morphants), and *pu.1* embryos in (A) (n = 47 control, 55 *ezh1* morphants).

(C) Flow cytometry (FC) for Gata1:dsRed<sup>+</sup> Erythroblasts gated on % live cells at 30 hpf in control and *ezh1* morphants (n = 5 embryos/sample x 6 biological replicates; two-tailed unpaired Student's t test, ns, not significant. Error bars indicate SD).

(D) Whole-embryo *gata2a* qPCR on control and *ezh1* morphants at 24 hpf relative to 18s (n  $\geq$  25 embryos/sample x 6 replicate clutches; two-tailed unpaired Student's t test, \*p < 0.05. Mean  $\pm$  SEM).

(E) Whole-embryo *gata2b* qPCR on *ezh1*<sup>+/+</sup>, *ezh1*<sup>+/-</sup>, and *ezh1*<sup>-/-</sup> embryos at 30 hpf relative to 18s, normalized to average dCT of *ezh1*<sup>+/+</sup> replicate clutches (n  $\geq$  25 embryos/sample x 3 replicate clutches; two-tailed unpaired Student's t test, \*p < 0.05. Mean  $\pm$  SEM).

(F) Confocal imaging of EdU<sup>+</sup> nuclei (magenta) in *Kdr1:mCherry*<sup>+</sup> embryos (green) at 36 hpf in control and *ezh1* morphants along the DA. Scale bar, 100  $\mu$ m.

(G) Quantification of *Kdr1*<sup>+</sup>/EdU<sup>+</sup> cells in (F) (n = 8 control, 10 *ezh1* morphants; two-tailed unpaired Student's t test, ns, not significant. Error bars indicate SD).

Figure S3 related to Figure 3.

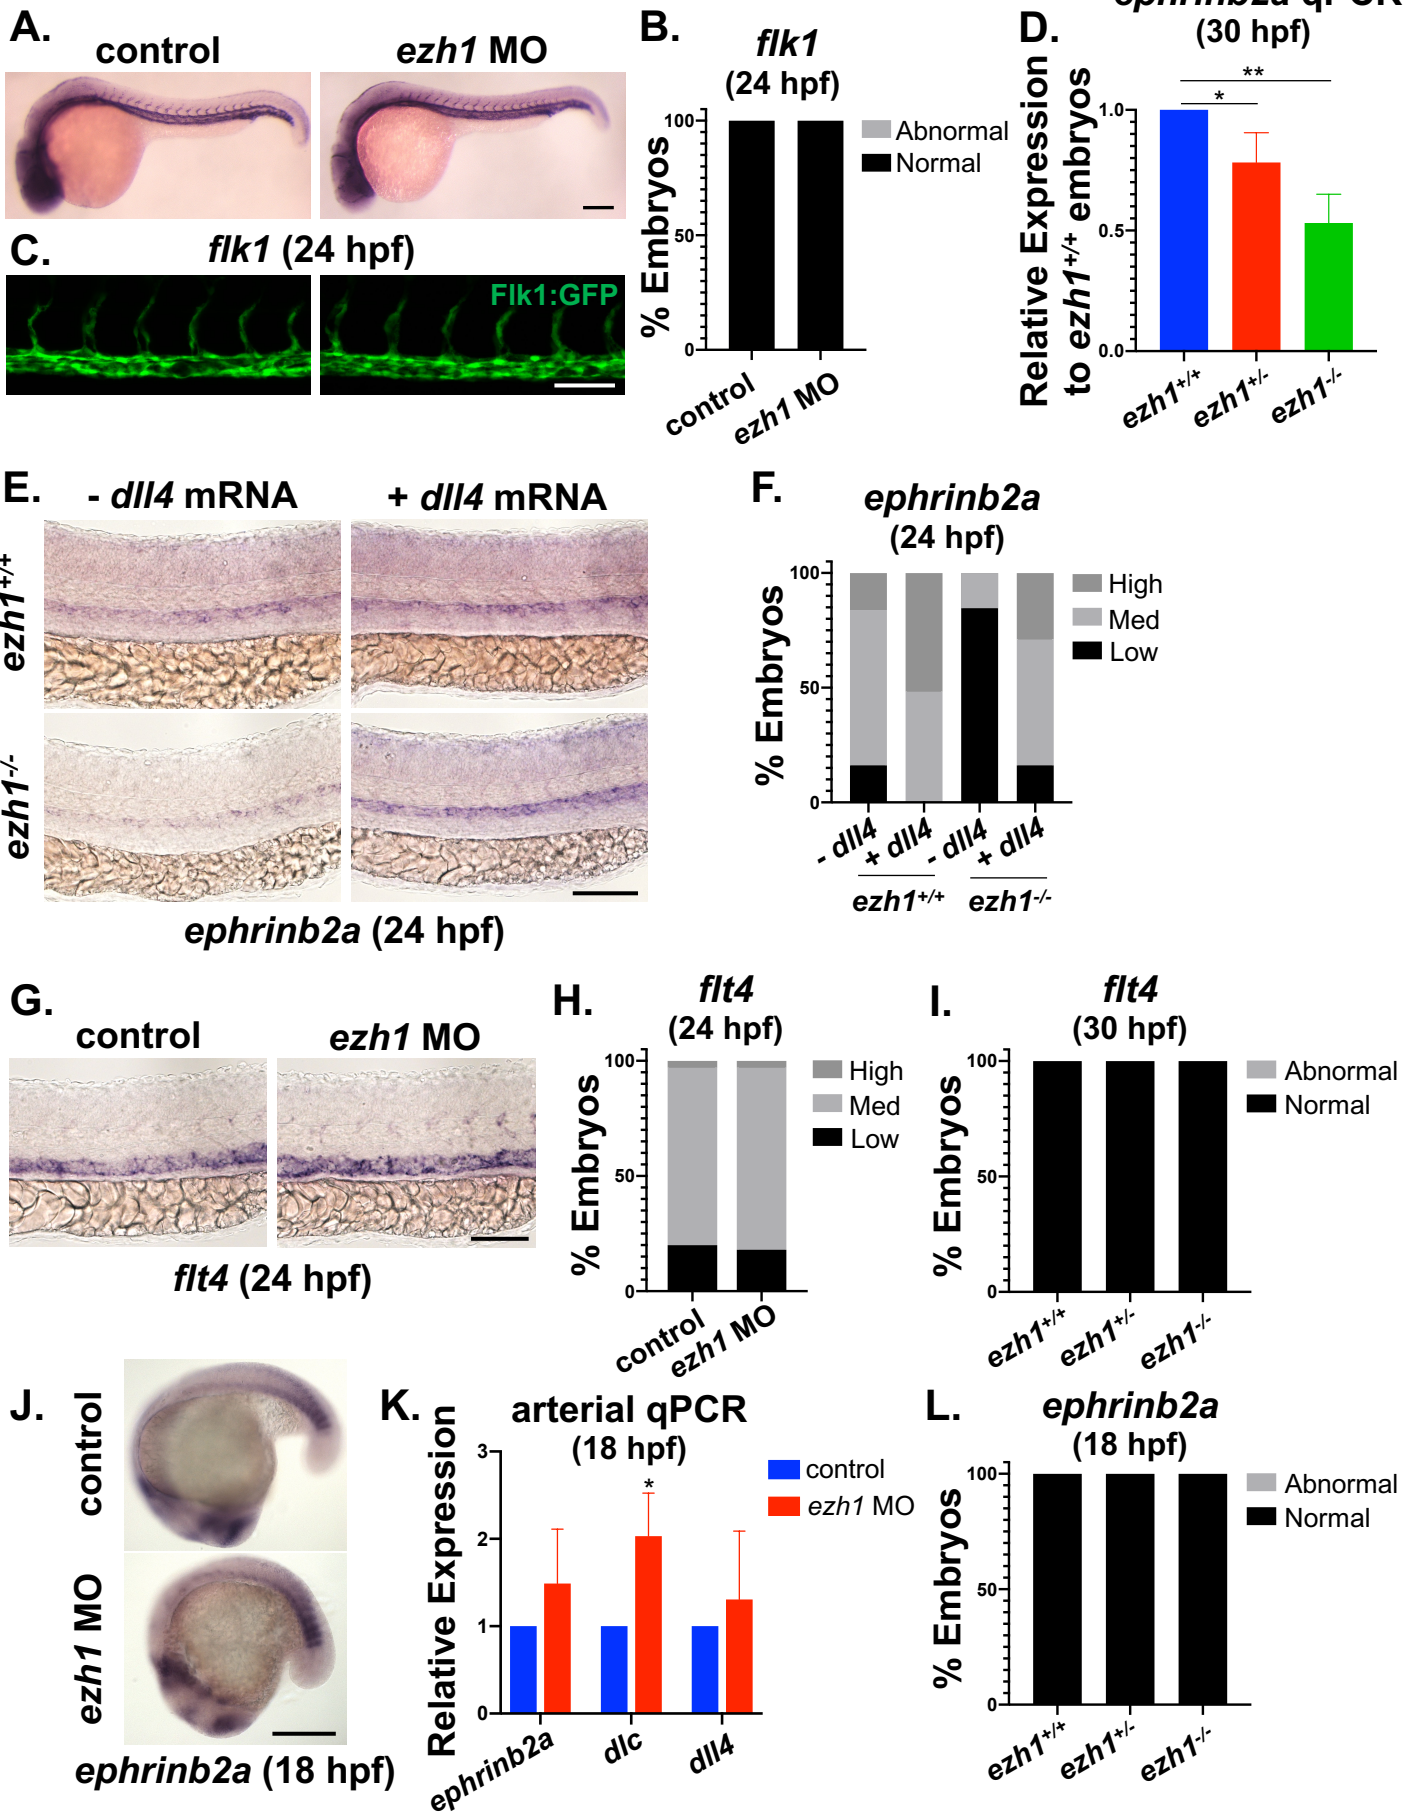

**Figure S3. Arterio-venous specification develops normally in *ezh1* morphants and mutants, related to Figure 3**

- (A) WISH for *flk1* at 24 hpf in control and *ezh1* morphants. Scale bar, 200  $\mu\text{m}$ .
- (B) Qualitative phenotypic distribution plot of embryos in (A) ( $n = 33$  control, 34 *ezh1* morphants).
- (C) Confocal imaging on Flk1:GFP<sup>+</sup> control and *ezh1* morphant embryos at 24 hpf along the DA. Scale bar, 100  $\mu\text{m}$ .
- (D) Whole-embryo *ephrinb2a* qPCR on *ezh1*<sup>+/+</sup>, *ezh1*<sup>+/-</sup>, and *ezh1*<sup>-/-</sup> embryos at 30 hpf relative to 18s, normalized to average dCT of *ezh1*<sup>+/+</sup> biological replicates ( $n \geq 25$  embryos/sample x 3 replicate clutches; two-tailed unpaired Student's t test, \* $p < 0.05$ , \*\* $p < 0.01$ . Mean  $\pm$  SEM).
- (E) WISH for *ephrinb2a* at 24 hpf in *ezh1*<sup>+/+</sup> and *ezh1*<sup>-/-</sup> embryos  $\pm$  *dll4* mRNA injection. Scale bar, 100  $\mu\text{m}$ .
- (F) Qualitative phenotypic distribution plot of embryos in (E) ( $n \geq 31$  embryos/condition).
- (G) WISH for *flt4* at 24 hpf in control and *ezh1* morphants. Scale bar, 100  $\mu\text{m}$ .
- (H) Qualitative phenotypic distribution plot of embryos in (G) ( $n = 42$  control, 41 *ezh1* morphants).
- (I) Qualitative phenotypic distribution plot of WISH for *flt4* at 30 hpf on *ezh1*<sup>+/+</sup>, *ezh1*<sup>+/-</sup>, and *ezh1*<sup>-/-</sup> embryos ( $n \geq 20$  embryos/genotype).
- (J) WISH for *ephrinb2a* at 18 hpf in control and *ezh1* morphants. Scale bar, 250  $\mu\text{m}$ .
- (K) Whole-embryo qPCR for arterial markers *ephrinb2a*, *dlc* and *dll4* on control and *ezh1* morphants at 18 hpf relative to 18s ( $n \geq 25$  embryos/sample x 3 replicate clutches; two-tailed unpaired Student's t test, \* $p < 0.05$ . Mean  $\pm$  SEM).
- (L) Qualitative phenotypic distribution plot of WISH for *ephrinb2a* at 18 hpf on *ezh1*<sup>+/+</sup>, *ezh1*<sup>+/-</sup>, and *ezh1*<sup>-/-</sup> embryos ( $n \geq 35$  embryos/genotype).



Figure S4 related to Figure 4.

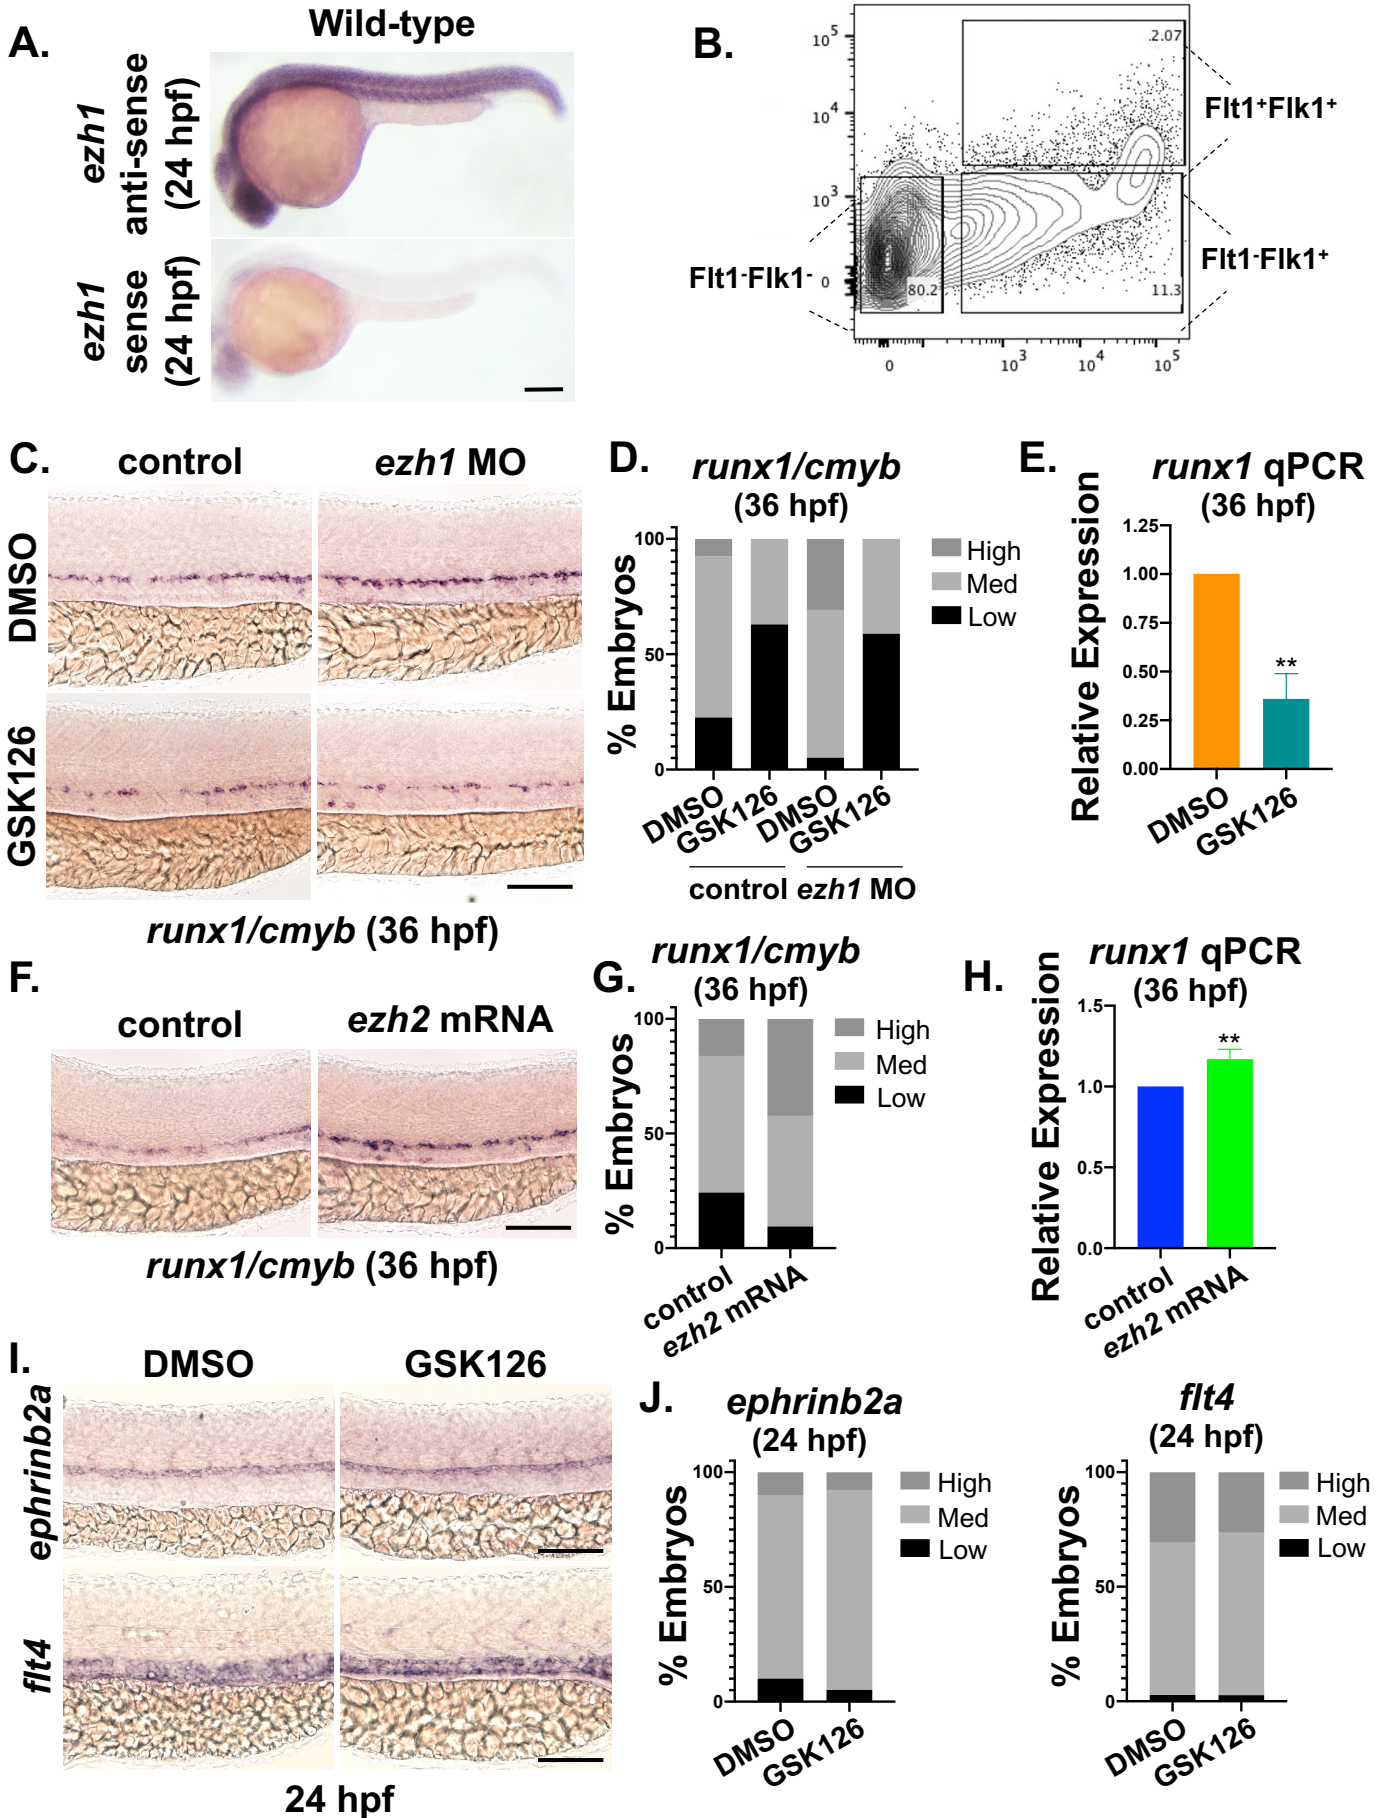

**Figure S4. Differential *ezh* requirements for endothelial maintenance and HSPC formation, related to Figure 4**

- (A) WISH using an *ezh1* anti-sense probe (upper panel) and *ezh1* sense probe (lower panel) at 24 hpf in wild-type embryos. Scale bar, 200  $\mu$ m.
- (B) FACS plot for cell sorting at 30 hpf using Flk1:GFP and Flt1:tdTomato reporter lines.
- (C) WISH for *runx1/cmyb* at 36 hpf in control and *ezh1* morphants  $\pm$  DMSO/1  $\mu$ M GSK126 treatment from 12-36 hpf. Scale bar, 100  $\mu$ m.
- (D) Qualitative phenotypic distribution plot of embryos in (C) ( $n \geq 34$  embryos/condition).
- (E) Whole-embryo *runx1* qPCR on DMSO and 1  $\mu$ M GSK126 treated embryos from 12-36 hpf relative to 18s ( $n \geq 25$  embryos/sample  $\times$  3 replicate clutches; two-tailed unpaired Student's t test,  $**p < 0.01$ . Mean  $\pm$  SEM).
- (F) WISH for *runx1/cmyb* at 36 hpf in control and *ezh2* mRNA injected embryos. Scale bar, 100  $\mu$ m.
- (G) Qualitative phenotypic distribution plot of embryos in (F) ( $n = 62$  control, 64 *ezh2* mRNA injected embryos).
- (H) Whole-embryo *runx1* qPCR on control and *ezh2* mRNA injected embryos at 36 hpf relative to 18s ( $n \geq 25$  embryos/sample  $\times$  3 replicate clutches; two-tailed unpaired Student's t test,  $**p < 0.01$ . Mean  $\pm$  SEM).
- (I) WISH for *ephrinb2a* (upper panels) and *flt4* (lower panels) at 24 hpf on DMSO and 1  $\mu$ M GSK126 treated embryos from 12-24 hpf. Scale bars, 100  $\mu$ m.
- (J) Qualitative phenotypic distribution plot of *ephrinb2a* embryos in (I) ( $n = 40$  DMSO, 39 1  $\mu$ M GSK126 treated embryos), and *flt4* embryos in (I) ( $n = 36$  DMSO, 38 1  $\mu$ M GSK126 treated embryos).

# Figure S5 related to Figure 5.

**A.**

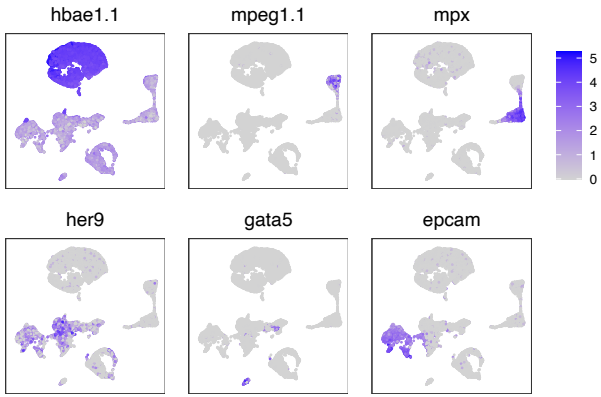

**B.**

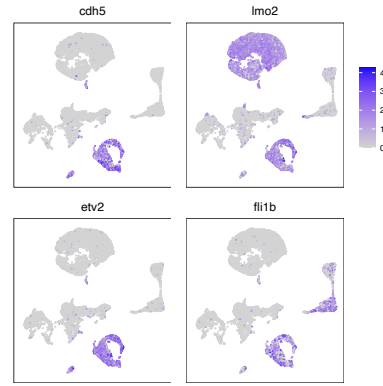

**C.**

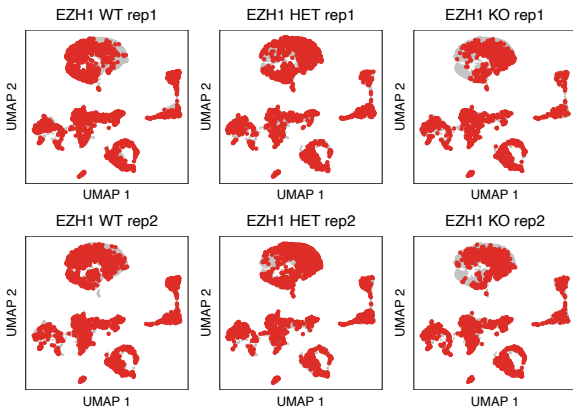

**D.**

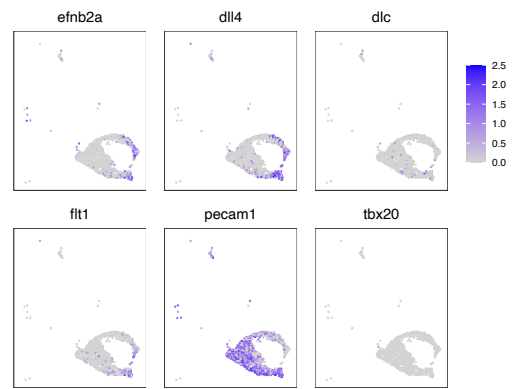

**E.**

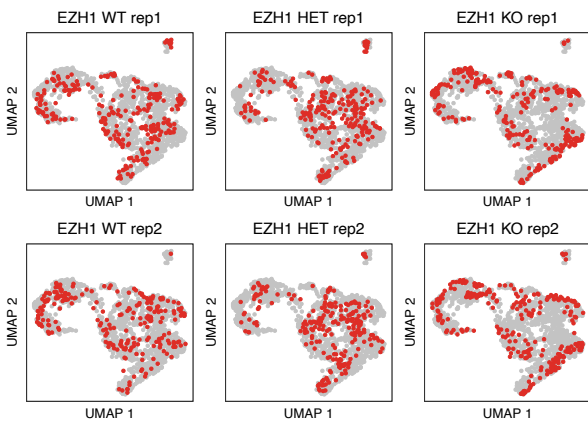

**F.**

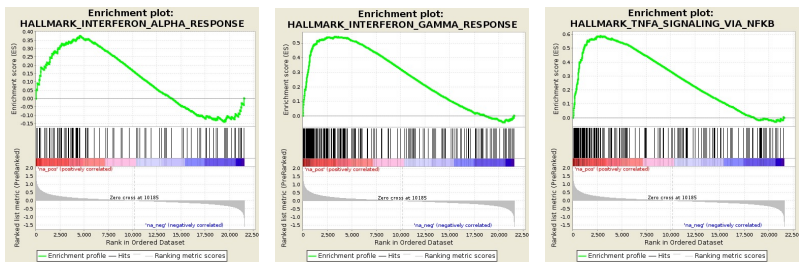

**Figure S5. scRNA-seq of *ezh1* mutant embryos reveals biological differences, related to Figure 5**

- (A) UMAP plot showing *hbae1.1*, *mpeg1.1*, *mpx*, *her9*, *gata5*, and *ecam* expression to verify cluster identity designations.
- (B) UMAP plot showing *cdh5*, *lmo2*, *etv2* and *fli1b* expression each localize to the endothelial cell clusters.
- (C) UMAP plot visualizing each technical replicate across *ezh1* genotypes.
- (D) UMAP plot showing arterial *efnb2a*, *dll4*, *dlc*, *flt1*, and *tbx20* as well as *pecam1* expression localize to the endothelial cell clusters.
- (E) UMAP plot visualizing each technical replicate across *ezh1* genotypes after re-clustering on the EC populations.
- (F) GSEA of day 28 CD34<sup>+</sup>CD38<sup>-</sup> HSPCs 5F plus shEZH1 compared to 5F plus shLUC cells from Vo et al., 2018 (n = 10 shEZH1, 8 shLUC samples).

Figure S6 related to Figure 6.

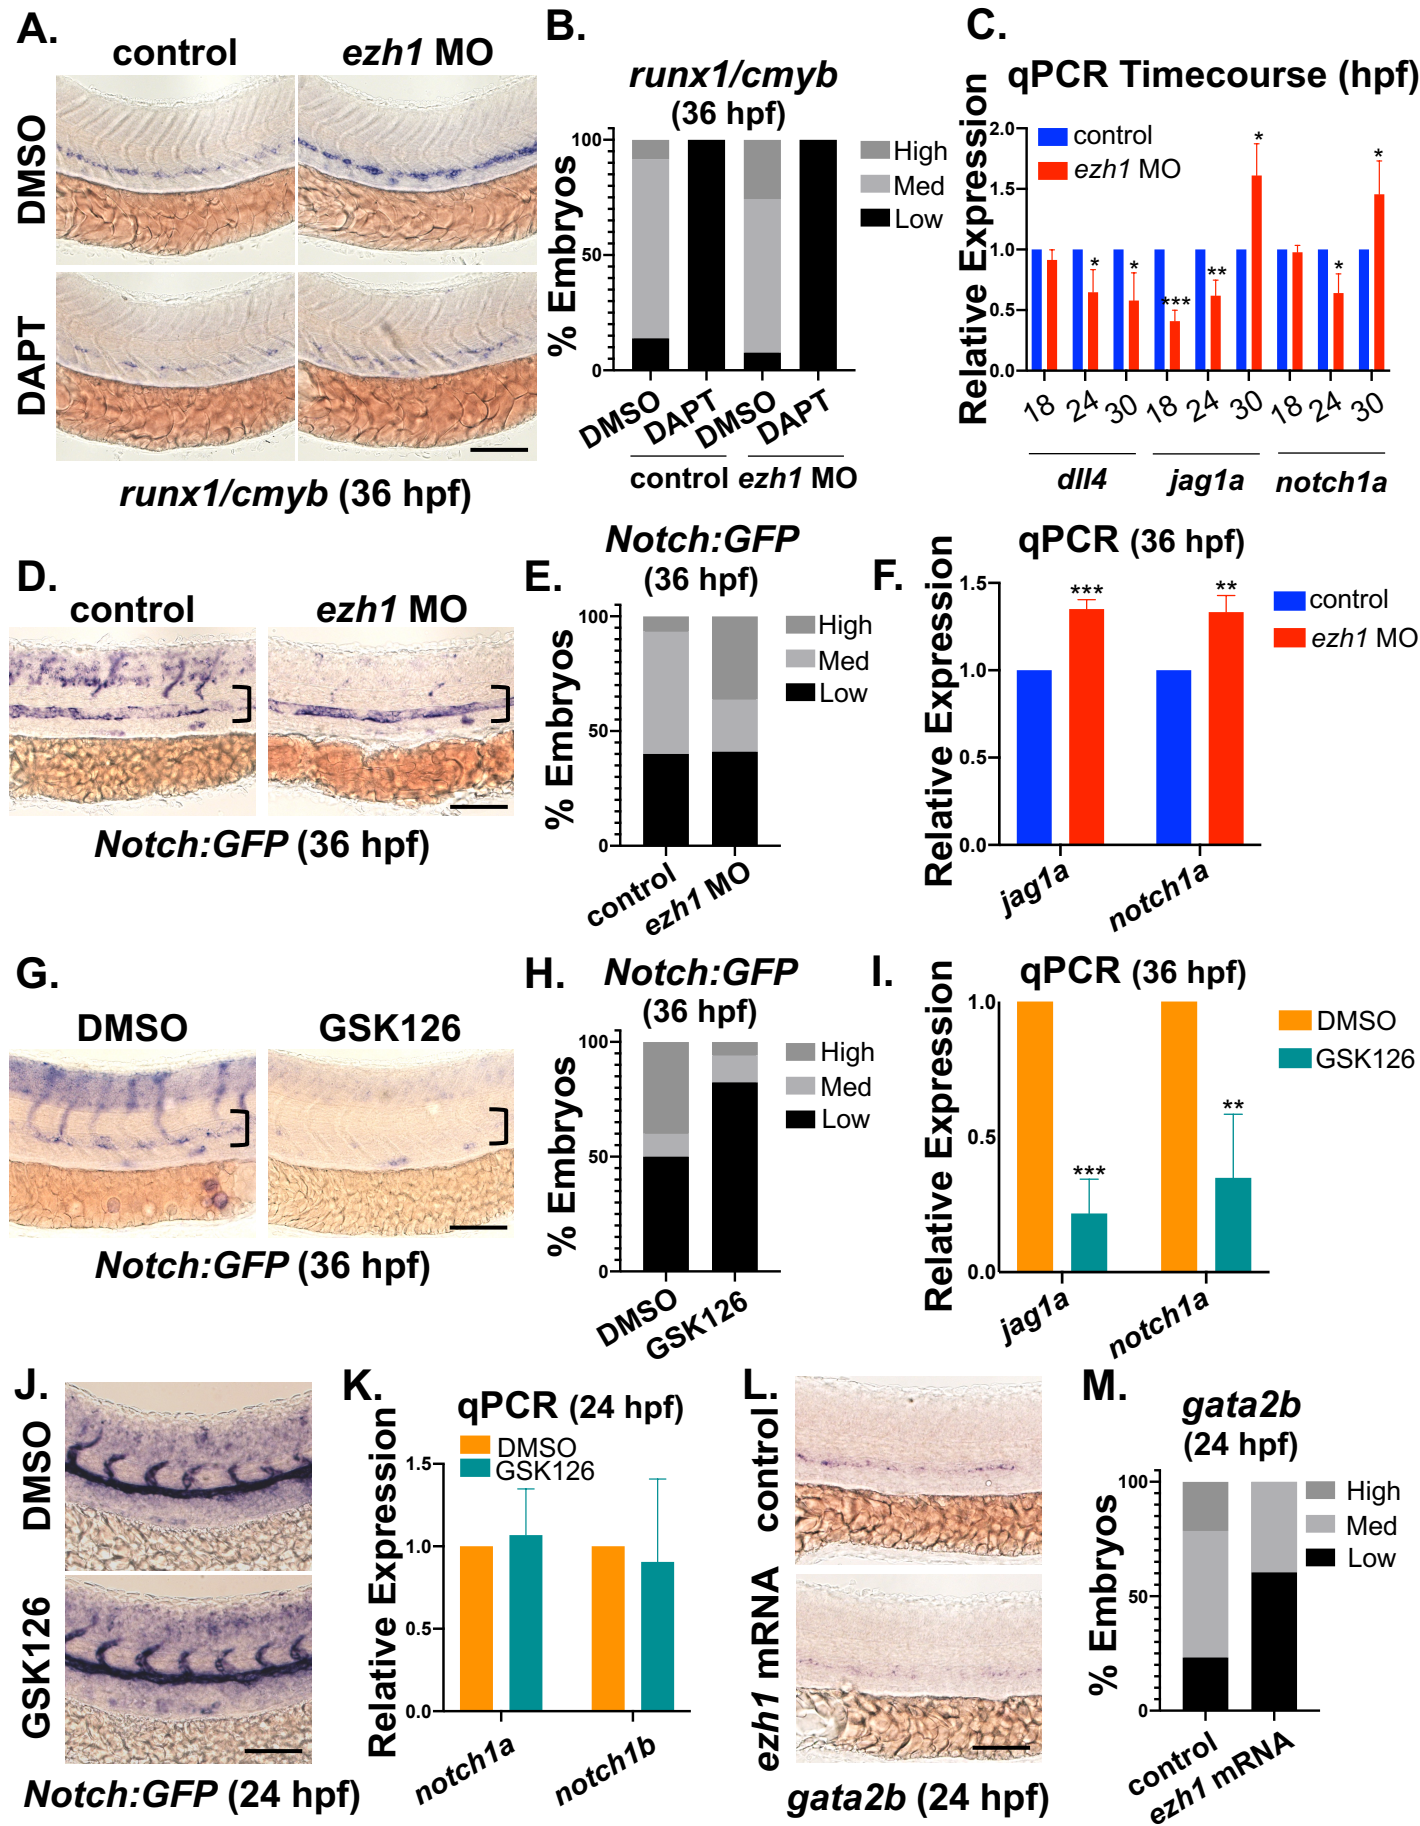

**Figure S6. HSPC expansion mediated by Notch activity is specific to Ezh1 knockdown, related to Figure 6**

- (A) WISH for *runx1/cmyb* at 36 hpf in control and *ezh1* morphants  $\pm$  DMSO/100  $\mu$ M DAPT treatment from 12-36 hpf. Scale bar, 100  $\mu$ m.
- (B) Qualitative phenotypic distribution plot of embryos in (A) ( $n \geq 34$  embryos/condition).
- (C) Whole-embryo *dll4*, *jag1a* and *notch1a* qPCR on control and *ezh1* morphants at 18, 24 and 30 hpf relative to 18s ( $n \geq 25$  embryos/sample  $\times$  3 replicate clutches/timepoint; two-tailed unpaired Student's t test, \* $p < 0.05$ , \*\* $p < 0.01$ , \*\*\* $p < 0.001$ . Mean  $\pm$  SEM).
- (D) WISH for *GFP* on Notch:*GFP*<sup>+</sup> control and *ezh1* morphant embryos at 36 hpf along the DA. Scale bar, 100  $\mu$ m.
- (E) Qualitative phenotypic distribution plot of embryos in (D) ( $n \geq 48$  embryos/condition).
- (F) Whole-embryo *jag1a* and *notch1a* qPCR on control and *ezh1* morphants at 36 hpf relative to 18s ( $n \geq 25$  embryos/sample  $\times$  3 replicate clutches; two-tailed unpaired Student's t test, \*\* $p < 0.01$ , \*\*\* $p < 0.001$ . Mean  $\pm$  SEM).
- (G) WISH for *GFP* in the DA on Notch:*GFP*<sup>+</sup> DMSO and 1  $\mu$ M GSK126 treated (12-36 hpf) embryos. Scale bar, 100  $\mu$ m.
- (H) Qualitative phenotypic distribution plot of embryos in (G) ( $n \geq 20$  embryos/condition).
- (I) Whole-embryo *jag1a* and *notch1a* qPCR on DMSO and 1  $\mu$ M GSK126 treated (12-26 hpf) embryos relative to 18s ( $n \geq 25$  embryos/sample  $\times$  3 replicate clutches; two-tailed unpaired Student's t test, \*\* $p < 0.01$ , \*\*\* $p < 0.001$ . Mean  $\pm$  SEM).
- (J) WISH for *GFP* in the DA on Notch:*GFP*<sup>+</sup> DMSO and 1  $\mu$ M GSK126 treated (12-24 hpf) embryos. Scale bar, 100  $\mu$ m.
- (K) Whole-embryo *notch1a* and *notch1b* qPCR on DMSO and 1  $\mu$ M GSK126 treated (12-24 hpf) embryos relative to 18s ( $n \geq 25$  embryos/sample  $\times$  3 replicate clutches; two-tailed unpaired Student's t test, ns, not significant. Mean  $\pm$  SEM).
- (L) WISH for *gata2b* at 24 hpf in control and *ezh1* mRNA injected embryos. Scale bar, 100  $\mu$ m.
- (M) Qualitative phenotypic distribution plot of embryos in (L) ( $n = 56$  control, 53 *ezh1* mRNA injected embryos).

## SUPPLEMENTAL EXPERIMENTAL PROCEDURES

### Zebrafish Transgenic/Mutant lines and Mouse Mutant line (related to Experimental Model and Subject Details)

| <b>Zebrafish: Official Name</b>                                                           | <b>Common Name</b>                    | <b>Reference</b>                            |
|-------------------------------------------------------------------------------------------|---------------------------------------|---------------------------------------------|
| <i>Tg(-6.0itga2b:EGFP)<sup>la2</sup></i>                                                  | CD41:eGFP                             | (Bertrand et al., 2008)                     |
| <i>Tg(kdrl:Has.HRAS-mCherry)<sup>s916</sup></i>                                           | Kdrl:mCherry                          | (Hogan et al., 2009)                        |
| <i>Tg(gata1a:dsRed)</i>                                                                   | Gata1:dsRed                           | (Traver et al., 2003)                       |
| <i>Tg(lmo2:EGFP)</i>                                                                      | Lmo2:eGFP                             | (Zhu et al., 2005)                          |
| <i>Tg(EPV:Tp1-MmuHbb:EGFP)</i>                                                            | Notch:GFP                             | (Parsons et al., 2009)                      |
| <i>Tg(-0.8flt1:tdTomato)</i>                                                              | Flt1:tdTomato                         | (Busmann et al., 2010)                      |
| <i>Tg(kdrl:GFP)<sup>la116</sup></i>                                                       | Flk1:GFP                              | (Choi et al., 2007)                         |
| <i>Tg(rag2:GFP)</i>                                                                       | Rag2:GFP                              | (Langenau et al., 2003)                     |
| <i>Tg(-6tal1:EGFP)</i>                                                                    | Scf:GFP                               | (Zhang and Rodaway, 2007)                   |
| <i>Tg(hsp70l:1xMYC-notch1a-intra)<sup>fb12</sup></i>                                      | Hsp70:NICD                            | (Zhao et al., 2014)                         |
| <i>ezh1<sup>b1394/b1394</sup></i>                                                         | <i>ezh1<sup>-/-</sup></i>             | (Yette et al., 2021)                        |
| <i>Tg(cmyb:EGFP)<sup>zf169</sup></i>                                                      | cMyb:GFP                              | (North et al., 2007)                        |
| <i>TgBAC(gata2b:KalTA4)<sup>sd32</sup>;</i><br><i>Tg(UAS:lifeact-GFP)<sup>mu271</sup></i> | Gata2b:Gal4; UAS:lifeactGFP           | (Butko et al., 2015); (Helker et al., 2013) |
| <i>ezh1<sup>b1394/b1394</sup>;</i><br><i>Tg(kdrl:EGFP)<sup>s843</sup></i>                 | <i>ezh1<sup>-/-</sup></i> ; Flk1:eGFP | (Yette et al., 2021); (Jin et al., 2005)    |
| <b>Mouse: Official Name</b>                                                               | <b>Common Name</b>                    | <b>Reference</b>                            |
| <i>Ezh1<sup>tm1Jnw/tm1Jnw</sup></i>                                                       | <i>Ezh1<sup>-/-</sup></i>             | (Ezhkova et al., 2011)                      |

### Morpholino Sequence

| <b>Name</b>         | <b>Sequence</b>                 | <b>ZFN ID</b>             | <b>Reference</b>     |
|---------------------|---------------------------------|---------------------------|----------------------|
| MO1-<br><i>ezh1</i> | 5' TGTGATTTCTACACACCTCTCCACA 3' | ZDB-MRPHLNO-<br>141118-18 | (Huang et al., 2013) |

### Chemical Modulators

| <b>Chemical</b> | <b>Source</b>     | <b>Identifier</b> |
|-----------------|-------------------|-------------------|
| GSK126          | Selleck Chemicals | S7061             |
| DAPT            | Selleck Chemicals | S2215             |

**SUPPLEMENTAL EXPERIMENTAL PROCEDURES**

**Oligos**

| <b>D. rerio<br/>Gene</b>                          | <b>Forward primer</b>                                     | <b>Reverse primer</b>                                       | <b>Reference</b>         |
|---------------------------------------------------|-----------------------------------------------------------|-------------------------------------------------------------|--------------------------|
| <b><i>gata2b</i><br/>(qPCR)</b>                   | ACCACCACACTCTGGAGAC                                       | CTGTTGCGTGTCTGAATACC                                        | Butko et al.,<br>2015    |
| <b><i>gata2a</i><br/>(qPCR)</b>                   | TCTTGAATCACTTGGACTCG                                      | GGACTGTGTATGAGGTGTGG                                        | Butko et al.,<br>2015    |
| <b><i>runx1</i><br/>(qPCR)</b>                    | CGTCTTCACAAACCCTCCTCAA                                    | GCTTTACTGCTTCATCCGGCT                                       | Carroll et<br>al., 2014  |
| <b><i>ephrinb2a</i><br/>(qPCR)</b>                | CAAGGACAGCAAATCGAATG                                      | TGAGCCAATGACTGATGAGG                                        | Carroll et<br>al., 2014  |
| <b><i>dll4</i><br/>(qPCR)</b>                     | TGGCCAGTTATCCTGTCTCC                                      | CTCACTGCATCCCTCCAGAC                                        | Carroll et<br>al., 2014  |
| <b><i>dlc</i><br/>(qPCR)</b>                      | CGCAGAAACCTCTGACCAGT                                      | CAGTCCTCACTGATAGCGAGTC                                      | Carroll et<br>al., 2014  |
| <b><i>tbx20</i><br/>(qPCR)</b>                    | AGATTGACAGCAACCCGTTT                                      | TGCTGAATGTCCTTCTTCTCC                                       | Carroll et<br>al., 2014  |
| <b><i>ezh1</i><br/>(qPCR)</b>                     | AGGAAGCGTCTAGTGAGGTCT                                     | ACGGCGATTTGACTGGAACA                                        | San et al.,<br>2016      |
| <b><i>ezh2</i><br/>(qPCR)</b>                     | ACTTTGAGCTCCTCCACACG                                      | CAACCAGTGCGGCAATTTCA                                        | Zhong et<br>al., 2018    |
| <b><i>notch1a</i><br/>(qPCR)</b>                  | CATCTACTGCGACGTGCCTA                                      | CCTGCATCAACACACTGACC                                        | Gerri et al.,<br>2018    |
| <b><i>jag1a</i><br/>(qPCR)</b>                    | ATTGGTGGATACTTCTGCGAGT                                    | CCATTCACCAGATCCTTACACA                                      | Monteiro et<br>al., 2016 |
| <b><i>18s</i><br/>(qPCR)</b>                      | TCGCTAGTTGGCATCGTTTAT                                     | CGGAGGTTTGAAGACGATCA                                        | Carroll et<br>al., 2014  |
| <b><i>b-actin</i></b>                             | TCTGTCCCATGCCAACCAT                                       | TGCCCTCGTGCTGTTTT                                           | Lim et al.,<br>2017      |
| <b><i>ezh1</i><br/>(sense<br/>probe)</b>          | TAATACGACTCACTATAGGGA<br>AAAGAGAAACATGCTTACGGG<br>CGACTGA | CTGCACATGCAGGCTTCTAAT                                       | This study               |
| <b><i>ezh1</i><br/>(antisense<br/>probe)</b>      | CATGCTTACGGGCGACTGA                                       | TAATACGACTCACTATAGGGA<br>AAAGAGAAACTGCACATGCA<br>GGCTTCTAAT | This study               |
| <b><i>dll4</i><br/>(mRNA<br/>generation<br/>)</b> | ATTTAGGTGACACTATAGCATCG<br>GTGCGCTCACTGTGGAA              | CGGCCGCGACCTGCAGCTCGAGC<br>AC (Amplifying/Sequencing)       | This study               |



| <b>D. rerio<br/>Gene</b>                            | <b>Forward primer</b>                        | <b>Reverse primer</b>                                 | <b>Reference</b>        |
|-----------------------------------------------------|----------------------------------------------|-------------------------------------------------------|-------------------------|
| <b><i>notch1b</i><br/>(qPCR)</b>                    | GTCTCAGCCCTGCCAGAAC                          | GCATTTAGGCTCATGGGTGA                                  | Gerri et al.,<br>2018   |
| <b><i>ezh2</i><br/>(sorted<br/>cell qPCR)</b>       | AAATCGGAGAAGGGTCCTGT                         | TCTGTTGGAGCTGAACATGC                                  | San et al.,<br>2016     |
| <b><i>ezh2</i><br/>(mRNA<br/>generation<br/>)</b>   | ATTTAGGTGACACTATAGATTCT<br>GAGTATAAACGACAGAC | CGGCCGCGACCTGCAGCTCGAGC<br>AC (Amplifying/Sequencing) | This study              |
| <b><i>ezh1</i><br/>(mutant<br/>genotypin<br/>g)</b> | GGCTGAATGTTTGTGGCTTTTTTC<br>ACC              | GGAAGTTGAACCGTGGCACCTG                                | (Yette et al.,<br>2021) |

**SUPPLEMENTAL EXPERIMENTAL PROCEDURES**  
**Antibodies/Kits/Constructs/Reagents**

| <b>Name</b>                                                                  | <b>Source</b>            | <b>Identifier</b> |
|------------------------------------------------------------------------------|--------------------------|-------------------|
| CD117 APC-eFluor780                                                          | eBioscience              | 47-1171-82        |
| CD41a PE-Cy7                                                                 | eBioscience              | 25-0411-82        |
| CD16/32 PE                                                                   | eBioscience              | 12-0161-82        |
| Ter119 APC                                                                   | BD                       | 557909            |
| Zebrafish Ephrin-B2 Antibody                                                 | R&D Systems              | AF1088            |
| Donkey anti-Goat IgG (H+L)<br>Secondary Antibody, Alexa<br>Fluor 647         | Invitrogen               | A-21447           |
| DAPI                                                                         | Sigma Aldrich            | D9542             |
| Click-iT™ EdU Cell Proliferation<br>Kit for Imaging, Alexa Fluor™<br>647 dye | Invitrogen               | C10340            |
| mMessage mMachine™ SP6<br>Transcription Kit                                  | Invitrogen               | AM1340            |
| RNAqueous Total RNA Isolation<br>Kit                                         | Invitrogen               | AM1912            |
| TURBO DNA-free Kit                                                           | Invitrogen               | AM1907            |
| SuperScript III First-Strand<br>Synthesis SuperMix for qRT-<br>PCR           | Invitrogen               | 11752050          |
| SuperScript VILO cDNA<br>Synthesis Kit                                       | Invitrogen               | 11-754-050        |
| RNeasy Micro Kit                                                             | Qiagen                   | 74004             |
| SYBR Green PCR Master Mix                                                    | Applied Biosystems       | 44-729-18         |
| Liberase TM                                                                  | Sigma                    | 5401127001        |
| Type I collagenase                                                           | Sigma                    | C0130             |
| SYTOX Red dead cell stain                                                    | Thermo Fisher Scientific | S34859            |
| pExpress-1 <i>ezh1</i> plasmid                                               | Horizon Discovery        | MDR1734-202779115 |
| pME18S-FL3 <i>dll4</i> plasmid                                               | Horizon Discovery        | MDR1734-202795513 |
| pME18S-FL3 <i>ezh2</i> plasmid                                               | Horizon Discovery        | MDR1734-202729457 |

## SUPPLEMENTAL EXPERIMENTAL PROCEDURES

### ***ezh1* morpholino validation**

Splicing efficiency of MO1-*ezh1* was determined by PCR on 30 hpf control and *ezh1* morphant cDNA using the following primers: *ezh1*ExonFW: 5' TCTCGATGTCCCAGTCCCAT 3' and *ezh1*ExonRV: 5' TCCCTTTTCGAGTGGCATCC 3'. We used *b-actin* qPCR primers as an internal reference gene, sequences listed in oligos table. Results were analyzed on a 2% agarose gel in Figure S1A.

### **Zebrafish Immunohistochemistry**

Wild-type and *ezh1* morphants were fixed in 4% paraformaldehyde at room temperature for 2 hours, washed with 1X PBS/0.1% Tween, and stored at 4°C prior to immunohistochemistry. Embryos were blocked/permeabilized with PBS-3% BSA containing 1% Tx100 and incubated with the following antibodies: Zebrafish Ephrin-B2 pAB (1:100 primary, R&D Systems), Alexa Fluor 647 secondary antibody (Invitrogen) was used for immunofluorescence and DAPI (10 µg/mL, Sigma Aldrich). N = 3 biological replicates, representative images are shown.

### **EdU Proliferation Assay**

EdU labeling was used to assess cell proliferation; *Kdr1:mCherry*<sup>+</sup> embryos were incubated at 4°C with 500 µM EdU/10% DMSO in E3 water for 1 hour, fixed in 4% paraformaldehyde, permeabilized with 1% Triton for 1 hour, and labeled using the Click-iT EdU Proliferation Kit (Molecular Probes, Invitrogen) for 1 hour at room temperature in accordance to the manufacturer's protocol.

### **Single-cell RNA-Sequencing**

Single-cell RNA-seq was performed on the 10X Genomics Chromium platform using single cell expression 3' v2 profiling chemistry. Following *Flk1*:GFP<sup>+</sup> FACS, cells from each *ezh1* genotype were loaded across two lanes in a 10X Genomics Single Cell 3' Chip as independent technical replicates and libraries were constructed according to the manufacturer's protocol. Cells were loaded into 10X lanes at cell concentrations to maintain an estimated doublet rate below 5%. The final libraries were assayed via an Agilent High Sensitivity dsDNA Bioanalyzer, normalized, pooled and shallow sequenced (Illumina MiniSeq), identifying ~11,000 high confidence cell barcodes in total across all libraries. The libraries were renormalized per the distribution of reads/library from the shallow sequencing run and deep sequenced on a NovaSeq S4 (Illumina) to a depth of ~100,000 reads per cell with cycle configuration 151-8-8-151.

### **Single-cell RNA-Sequencing Analysis**

A custom *Danio rerio* reference genome containing a GFP transcript was generated using Ensembl Release 101 ([ftp://ftp.ensembl.org/pub/release-101/gtf/danio\\_rerio/](ftp://ftp.ensembl.org/pub/release-101/gtf/danio_rerio/)) with the mkref command from cellranger v2.1 (10X Genomics). Sequencing data was aligned to the custom reference and subsequently processed with cellranger count. Raw count matrices for each library were read into R and analyzed with Seurat v3.2. High-quality cells were retained based on technical metrics: <5% mitochondrial reads, >1000 UMI counts, and >500 genes detected. Count matrix normalization, scaling and variable feature selection was performed with an SCT transform with regression of the proportion of mitochondrial reads. Principle component analysis was performed and the first 15 PCs were utilized for clustering after visual inspection of the proportion of variance explained by each PC. Graph-based clustering was performed with FindClusters() and visualized via a UMAP embedding. Differentially enriched genes were identified for each cluster with FindMarkers() and clusters annotated according to literature-supported marker genes. Cells defined as endothelium were subset from the raw count matrix and re-clustered with 20 PCs per an analogous procedure used for the full dataset. Differentially expressed genes were identified between genotypes or clusters as  $\log_2(\text{fold-change}) < -0.25$  or  $\log_2(\text{fold-change}) > 0.25$  and a Benjamini-Hochberg -corrected FDR < 0.05. Gene ontology analysis was performed using GOrilla (Eden et al., 2009).

## SUPPLEMENTAL EXPERIMENTAL PROCEDURES

### **quantitative PCR data analysis**

Data analysis used the delta/delta Ct method with fold-change calculated to controls for each biological clutch for whole-embryo qPCR. Relative expression level in *ezh1* mutants was calculated by averaging the dCt of *ezh1*<sup>+/+</sup> biological clutches and using the delta/delta Ct method with fold-change of each biological replicate within *ezh1*<sup>+/-</sup> and *ezh1*<sup>-/-</sup> genotypes against average dCt of stage-matched *ezh1*<sup>+/+</sup> embryos. qPCR for FACS-isolated samples calculated relative to 18s.

## SUPPLEMENTAL REFERENCES

- Bertrand, J.Y., Kim, A.D., Teng, S., and Traver, D. (2008). CD41<sup>+</sup> cmyb<sup>+</sup> precursors colonize the zebrafish pronephros by a novel migration route to initiate adult hematopoiesis. *Development* *135*, 1853-1862.
- Bussmann, J., Bos, F.L., Urasaki, A., Kawakami, K., Duckers, H.J., and Schulte-Merker, S. (2010). Arteries provide essential guidance cues for lymphatic endothelial cells in the zebrafish trunk. *Development* *137*, 2653-2657.
- Butko, E., Distel, M., Pouget, C., Weijts, B., Kobayashi, I., Ng, K., Mosimann, C., Poulain, F.E., McPherson, A., Ni, C.W., Stachura, D.L., Del Cid, N., Espin-Palazón, R., Lawson, N.D., Dorsky, R., Clements, W.K., and Traver, D. (2015). Gata2b is a restricted early regulator of hemogenic endothelium in the zebrafish embryo. *Development* *142*, 1050-1061.
- Carroll, K.J., Esain, V., Garnaas, M.K., Cortes, M., Dovey, M.C., Nissim, S., Frechette, G.M., Liu, S.Y., Kwan, W., Cutting, C.C., Harris, J.M., Gorelick, D.A., Halpern, M.E., Lawson, N.D., Goessling, W., and North, T.E. (2014). Estrogen Defines the Dorsal Ventral Limit of VEGF Regulation to Specify the Location of the Hemogenic Endothelial Niche. *Dev. Cell* *29*, 437-453.
- Choi, J., Dong, L., Ahn, J., Dao, D., Hammerschmidt, M., and Chen, J.-N. (2007). FoxH1 negatively modulates *flk1* gene expression and vascular formation in zebrafish. *Dev. Biol.* *304*, 735-744.
- Eden, E., Navon, R., Steinfeld, I., Lipson, D., and Yakhini, Z. (2009). GOrilla: a tool for discovery and visualization of enriched GO terms in ranked gene lists. *BMC Bioinformatics* *10*, 48
- Ezhkova, E., Lien, W.-H., Stokes, N., Pasolli, H.A., Silva, J.M., and Fuchs, E. (2011). EZH1 and EZH2 cogovern histone H3K27 trimethylation and are essential for hair follicle homeostasis and wound repair. *Genes Dev.* *25*, 485-498.
- Gerri, C., Marass, M., Rossi, A., and Stainer, D.Y.R. (2018). Hif-1 $\alpha$  and Hif-2 $\alpha$  regulate hemogenic endothelium and hematopoietic stem cell formation in zebrafish. *Blood* *131*, 963-973.
- Helker, C.S.M., Schuermann, A., Karpanen, T., Zeuschner, D., Belting, H.-G., Affolter, M., Schulte-Merker, S., and Herzog, W. (2013). The zebrafish common cardinal veins develop by a novel mechanism: lumen ensheathment. *Development* *140*, 2776-2786.
- Hogan, B.M., Bos, F.L., Bussmann, J., Witte, M., Chi, N.C., Duckers, H.J., and Schulte-Merker, S. (2009). Ccbe1 is required for embryonic lymphangiogenesis and venous sprouting. *Nat. Genet.* *41*, 396-398.
- Huang, H.T., Kathrein, K.L., Barton, A., Gitlin, Z., Huang, Y.H., Ward, T.P., Hofmann, O., Dibiase, A., Song, A., Tyekucheva, S., Hide, W., Zhou, Y., and Zon, L.I. (2013). A network of epigenetic regulators guides developmental haematopoiesis in vivo. *Nat. Cell Biol.* *15*, 1516-1525.
- Jin, S.-W., Beis, D., Mitchell, T., Chen, J.-N., and Stainer, D.Y.R. (2005). Cellular and molecular analyses of vascular tube and lumen formation in zebrafish. *Development* *132*, 5199-5209.
- Langenau, D.M., Traver, D., Ferrando, A.A., Kutok, J.L., Aster, J.C., Kanki, J.P., Lin, S., Prochownik, E., Trede, N.S., Zon, L.I., and Look, A.T. (2003). Myc-Induced T cell Leukemia in Transgenic Zebrafish. *Science* *299*, 887-890.
- Lim, S.-E., Esain, V., Kwan, W., Theodore, L.N., Cortes, M., Frost, I.M., Liu, S.Y., and North, T.E. (2017). HIF1 $\alpha$ -induced PDGFR $\beta$  signaling promotes developmental HSC production via IL-6 activation. *Exp. Hematol.* *46*, 83-95.

- Monteiro, R., Pinheiro, P., Joseph, N., Peterkin, T., Koth, J., Repapi, E., Bonkhofer, F., Kirmizitas, A., and Patient, R. (2016). Transforming Growth Factor  $\beta$  Drives Hemogenic Endothelium Programming and the Transition to Hematopoietic Stem Cells. *Dev. Cell* 38, 358-370.
- North, T.E., Goessling, W., Walkley, C.R., Lengerke, C., Kopani, K.R., Lord, A.M., Weber, G.J., Bowman, T.V., Jang, I.H., Grosser, T., FitzGerald, G.A., Daley, G.Q., Orkin, S.H., and Zon, L.I. (2007). Prostaglandin E2 regulates vertebrate haematopoietic stem cell homeostasis. *Nature* 447, 1007-1011.
- Parsons, M.J., Pisharath, H., Yusuff, S., Moore, J.C., Siekmann, A.F., Lawson, N., and Leach, S.D. (2009). Notch-responsive cells initiate the secondary transition in larval zebrafish pancreas. *Mech. Dev.* 126, 898-912.
- San, B., Chrispijn, N.D., Wittkopp, N., van Heeringen, S.J., Lagendijk, A.K., Aben, M., Bakkers, J., Ketting, R.F., and Kamminga, L.M. (2016). Normal formation of a vertebrate body plan and loss of tissue maintenance in the absence of *ezh2*. *Sci. Rep.* 6, 24658.
- Traver, D., Paw, B.H., Poss, K.D., Penberthy, W.T., Lin, S., and Zon, L.I. (2003). Transplantation and *in vivo* imaging of multilineage engraftment in zebrafish bloodless mutants. *Nat. Immunol.* 4, 1238-1246.
- Yette, G. A., Stewart, S., and Stankunas, K. (2021). Zebrafish Polycomb repressive complex-2 critical roles are largely Ezh2- over Ezh1-driven and concentrate during early embryogenesis. *BioRxiv*, doi: <https://doi.org/10.1101/2020.12.31.424918>.
- Zhang, X.Y., and Rodaway, A.R.F. (2007). SCL-GFP transgenic zebrafish: *in vivo* imaging of blood and endothelial development and identification of the initial site of definitive hematopoiesis. *Dev. Biol.* 307, 179-194.
- Zhao, L., Borikova, A.L., Ben-Yair, R., Guner-Ataman, B., MacRae, C.A., Lee, R.T., Burns, C.G., and Burns, C.E. (2014). Notch signaling regulates cardiomyocyte proliferation during zebrafish heart regeneration. *PNAS* 111(4), 1403-1408.
- Zhong, Y., Ye, Q., Chen, C., Wang, M., and Wang, H. (2018). Ezh2 promotes clock function and hematopoiesis independent of histone methyltransferase activity in zebrafish. *Nuc. Acids. Res.* 46, 3382-3399.
- Zhu, H., Traver, D., Davidson, A.J., Dibiase, A., Thisse, C., Thisse, B., Nimer, S., and Zon, L.I. (2005). Regulation of the *lmo2* promoter during hematopoietic and vascular development in zebrafish. *Dev. Biol.* 281, 256-269.
